# Supplementary material
Source: PubMed Central journal article supplement (PMC10524664)
Supplement: NIHMS1897362-supplement-supinfo.pdf [file NIHMS1897362-supplement-supinfo.pdf]

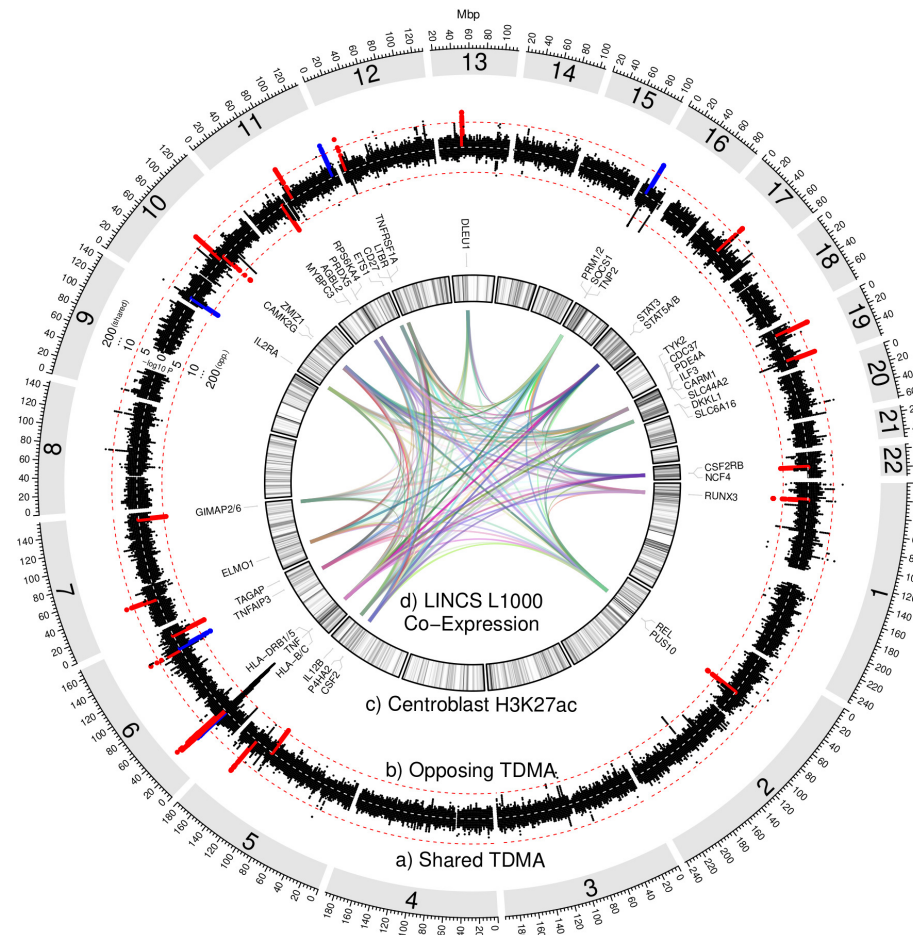

**Supplementary Figure 1: Equally weighted trans-disease meta-analysis (TDMA).** Circular diagram including the following: a) Manhattan plot of shared (same direction of effect) psoriasis/MS TDMA signals, showing markers more significant in TDMA than for either trait. b) Manhattan plot of opposing (opposite direction of effect) psoriasis/MS trans-disease meta-analysis (TDMA) signals, showing markers more significant in TDMA than for either trait. **Red** dashed lines indicate the genome-wide significance ( $p < 5 \times 10^{-8}$ ) threshold for shared and opposing signals, respectively. Loci which meet this threshold and are suggestively significant ( $p < 1 \times 10^{-4}$ ) for both traits are highlighted in **red** (if identified through our original TDMA approach) or **blue** (for additional loci identified using GCTA-COJO). c) Density of H3K27ac active enhancer marks for B-cell centroblasts (the most enriched cell type among the TDMA loci, compared to other established loci for psoriasis and MS). The darker the color, the higher the proportion of regulatory marks overlapping each 2Mbp region. Genes reported by previous psoriasis and MS GWAS<sup>1,4,96-99</sup> are labeled for each locus. d) Links between genes, according to co-expression in L1000 assay perturbation experiments from NIH's Library of Integrated Network-Based Cellular Signatures (LINCS). Each link has a random color, with transparency (alpha) values set proportional to the log-scaled number of experiments in which at least one gene from a locus is co-expressed with at least one gene from another locus, such that more opaque links represent pairs of loci with genes co-expressed in more experiments.

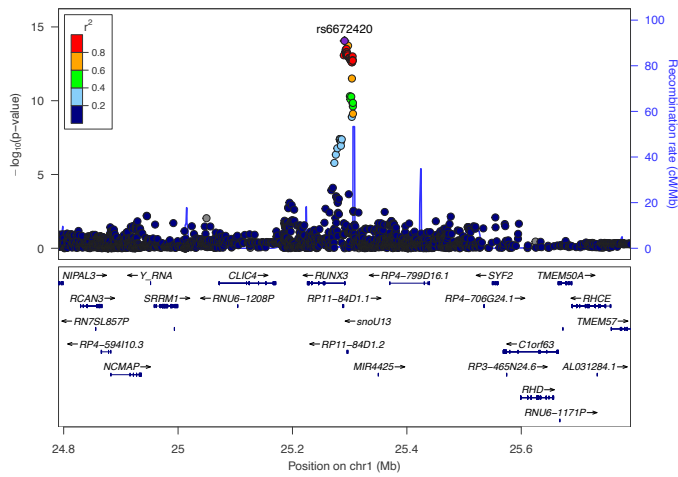

Psoriasis

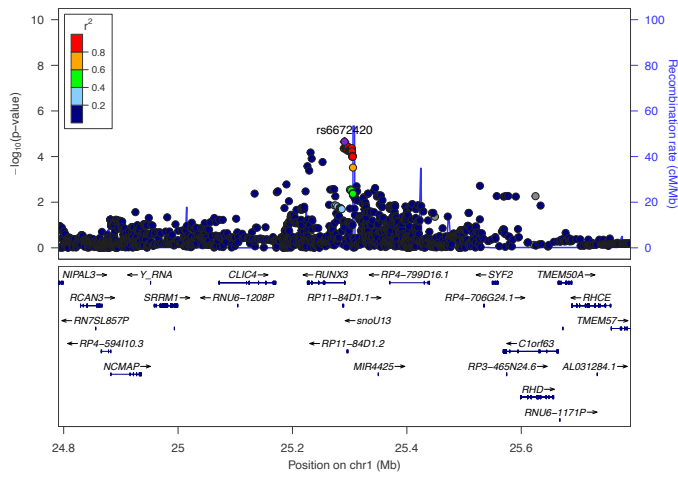

MS

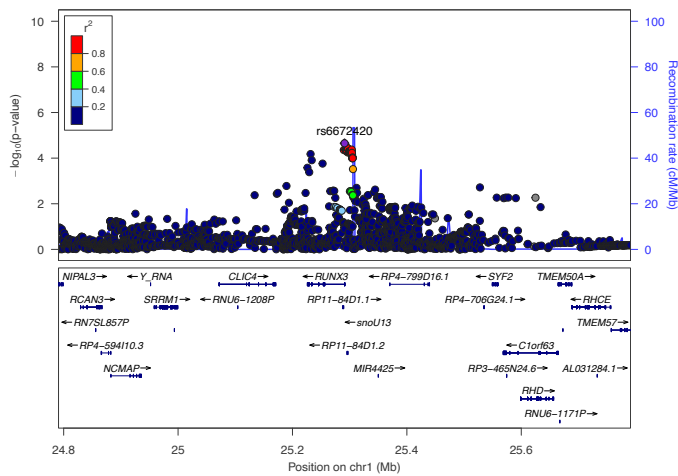

TDMA

Supplementary Figure 2: Regional association plot (equally weighted TDMA) for opposing locus at 1p36.11

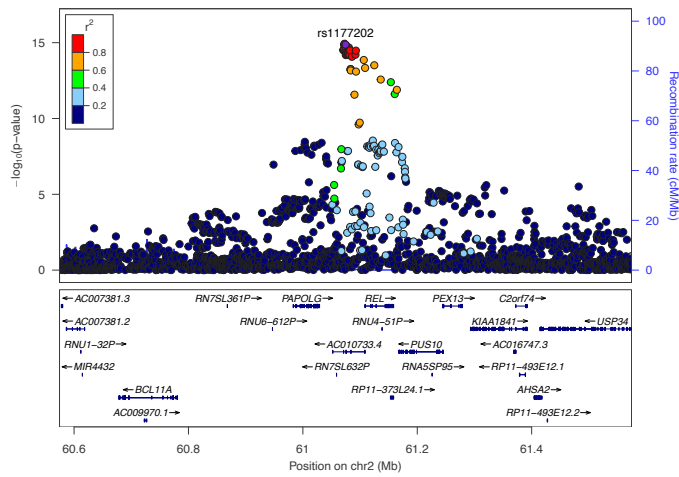

Psoriasis

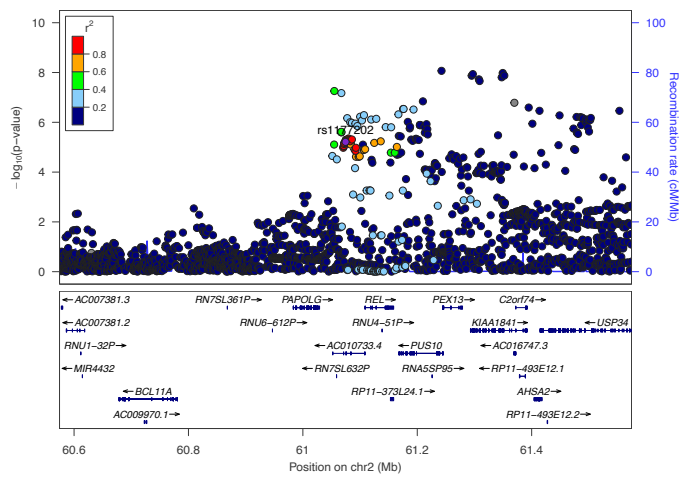

MS

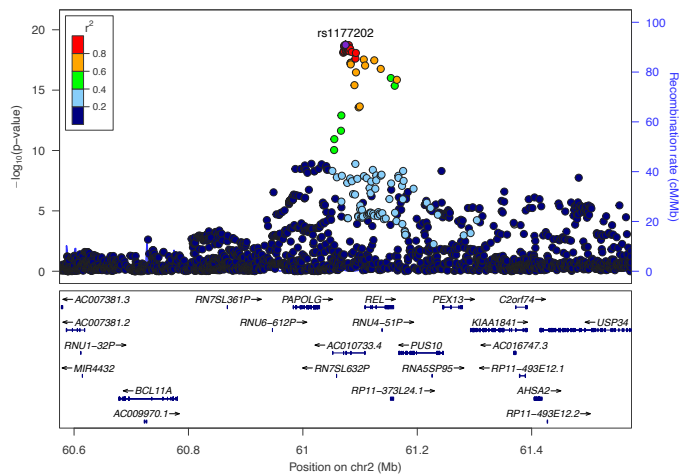

TDMA

Supplementary Figure 3: Regional association plot (equally weighted TDMA) for opposing locus at 2p16.1

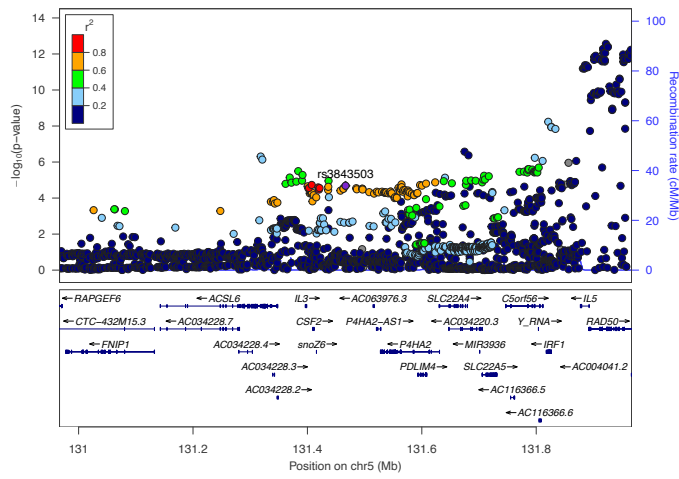

Psoriasis

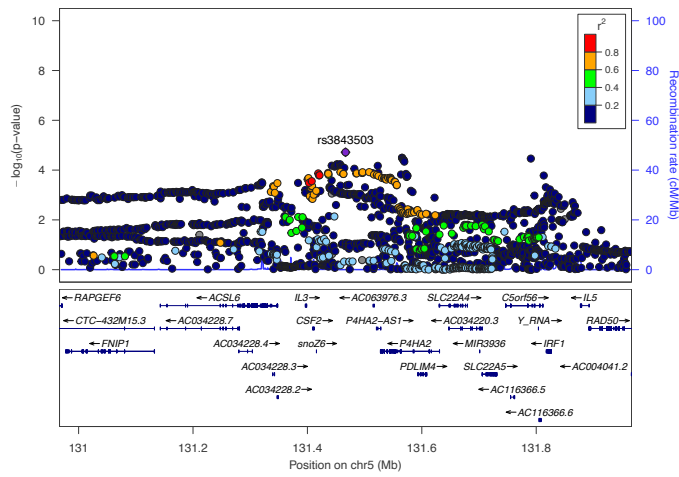

MS

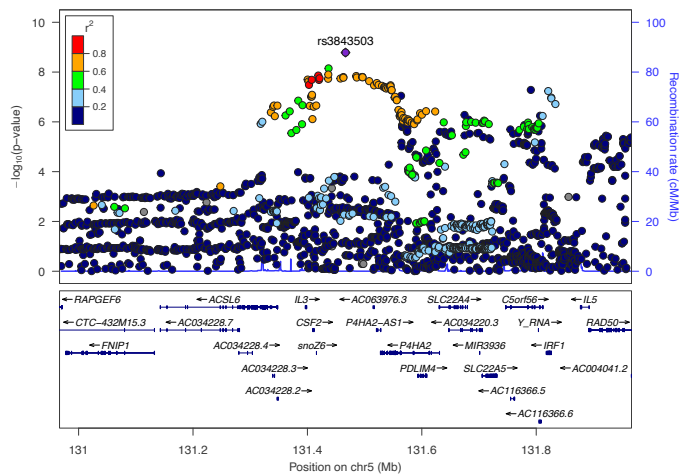

TDMA

Supplementary Figure 4: Regional association plot (equally weighted TDMA) for opposing locus at 5q31.1

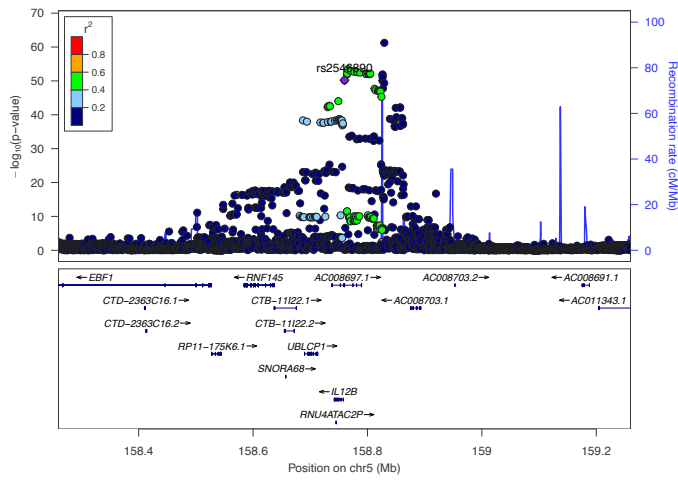

Psoriasis

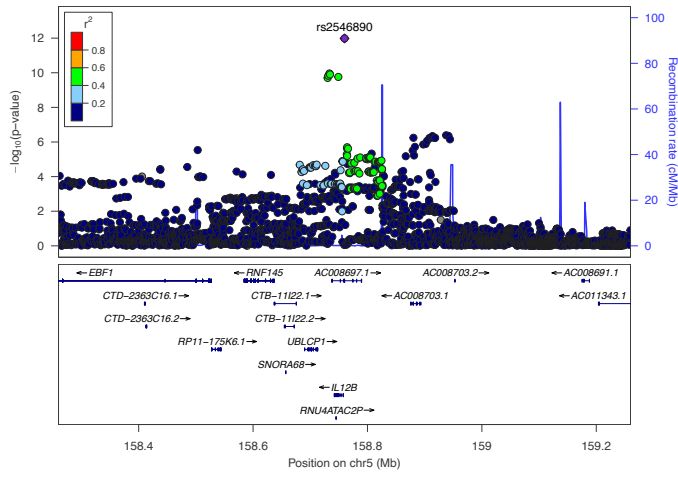

MS

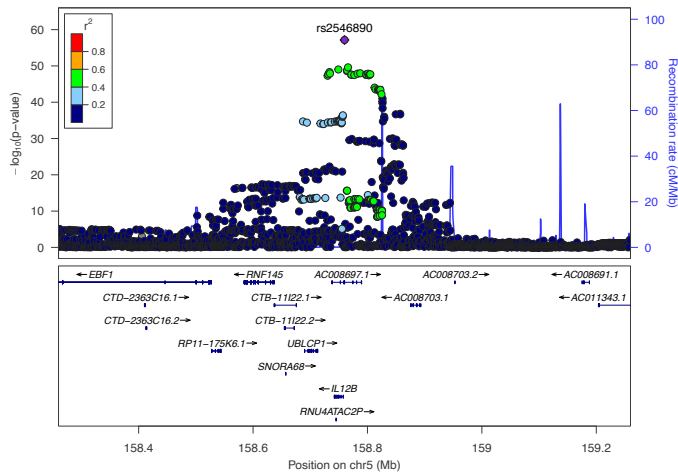

TDMA

Supplementary Figure 5: Regional association plot (equally weighted TDMA) for shared locus at 5q33.3

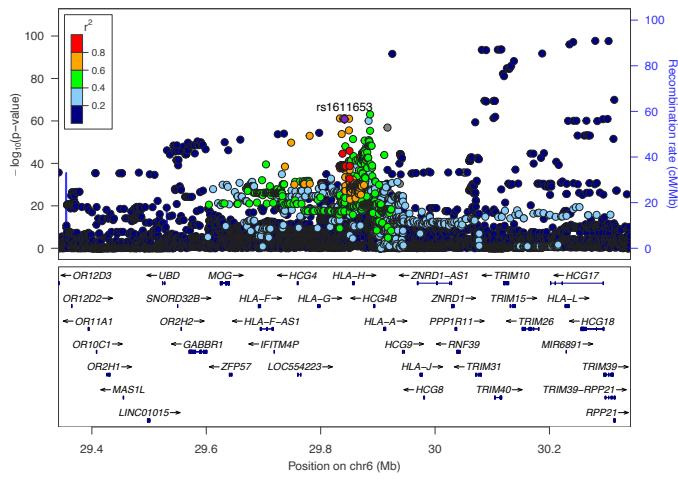

Psoriasis

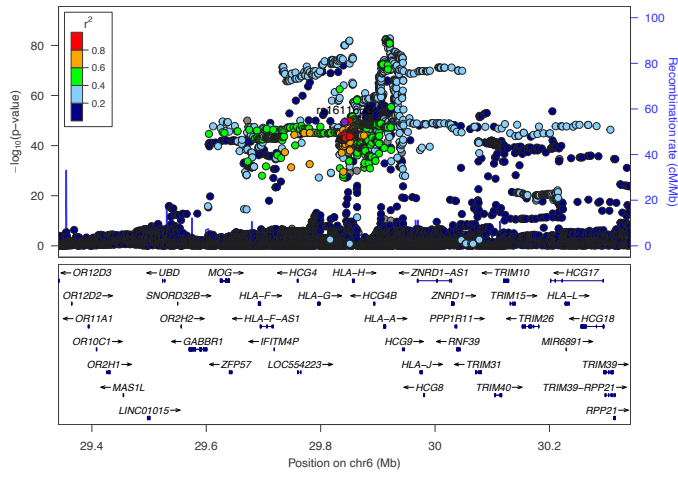

MS

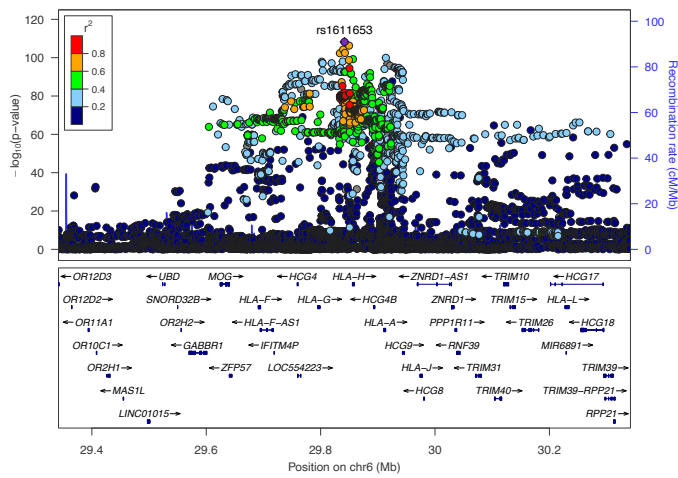

TDMA

Supplementary Figure 6: Regional association plot (IVW TDMA) for opposing locus at 6q22.1

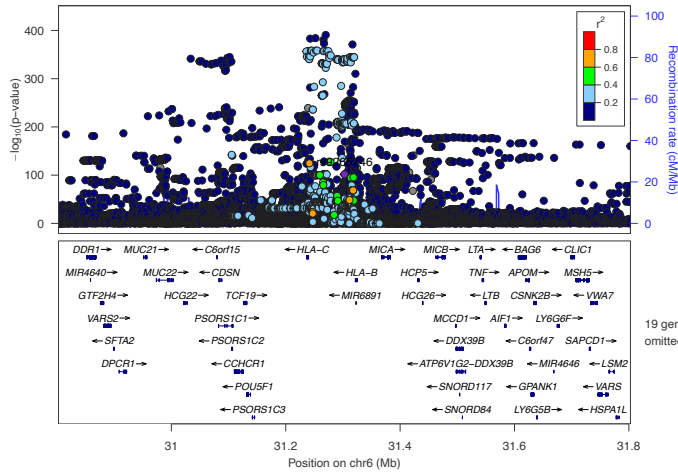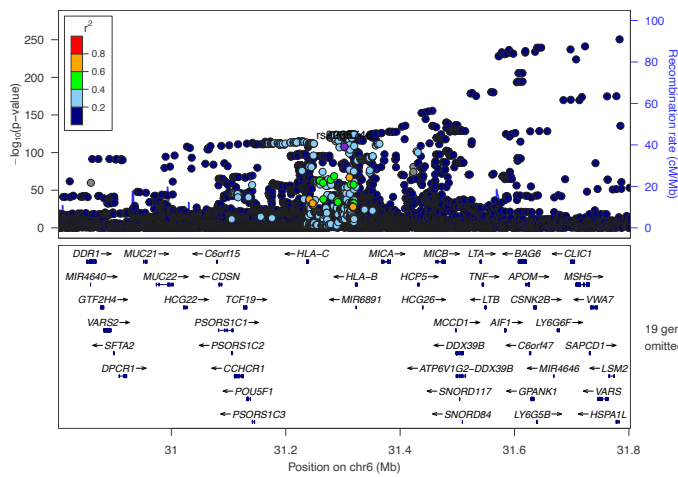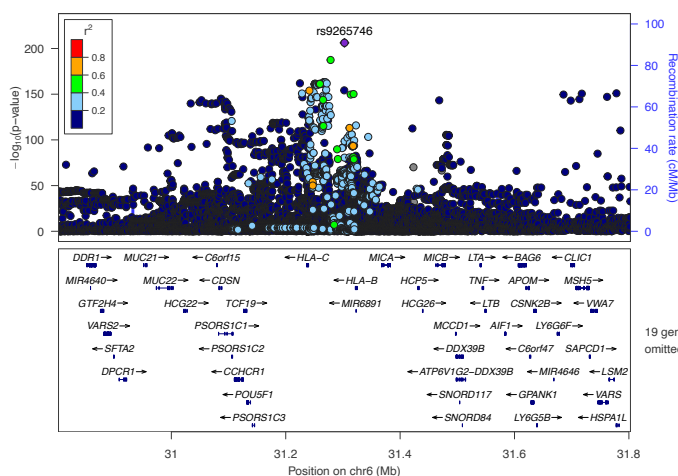

Supplementary Figure 7: Regional association plot (equally weighted TDMA) for shared locus at 6q21.33

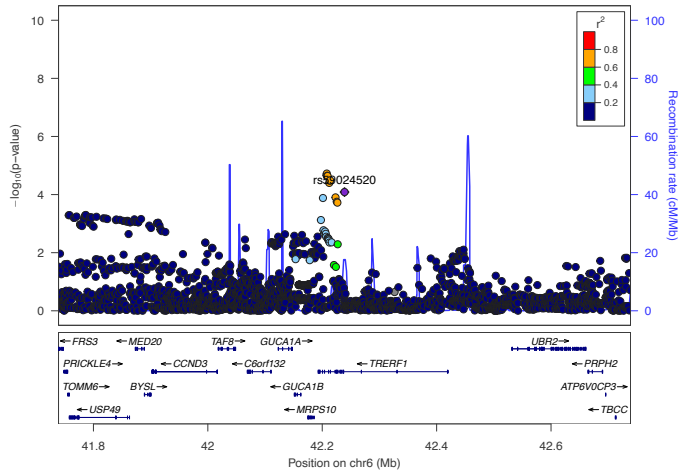

Psoriasis

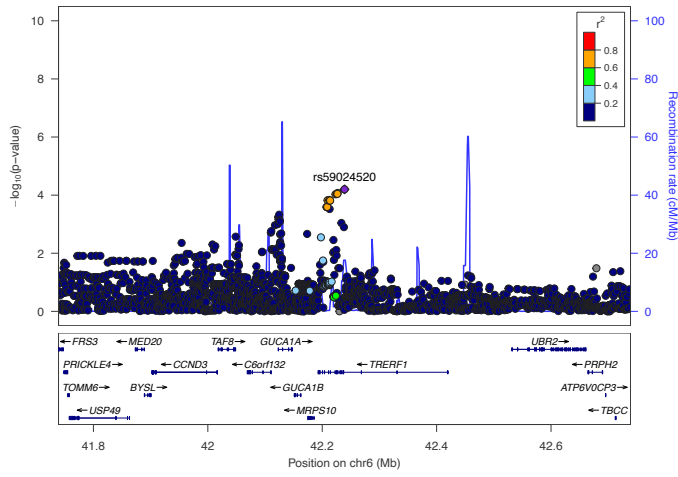

MS

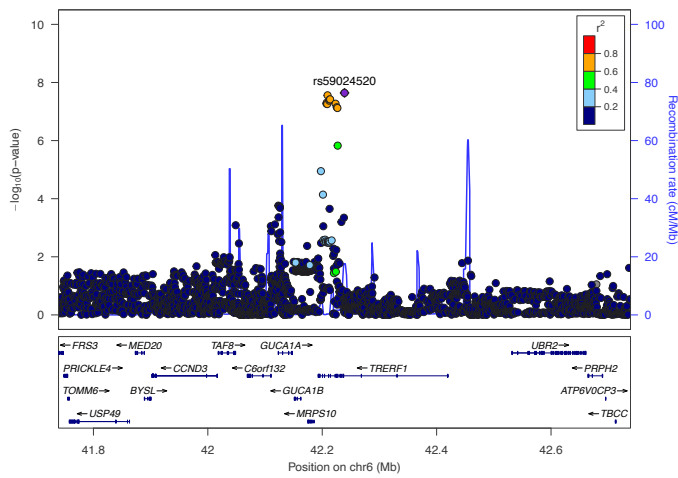

TDMA

Supplementary Figure 8: Regional association plot (IVW TDMA) for shared locus at 6p21.1



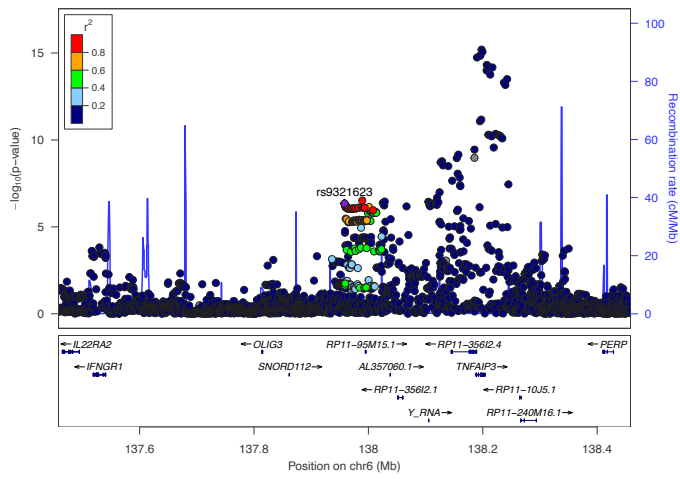

Psoriasis

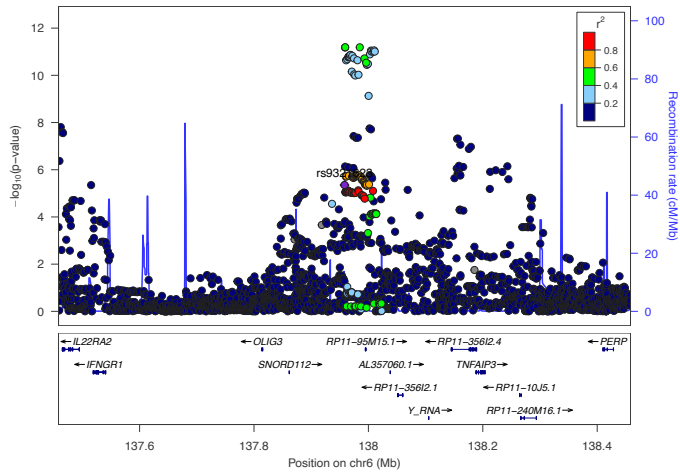

MS

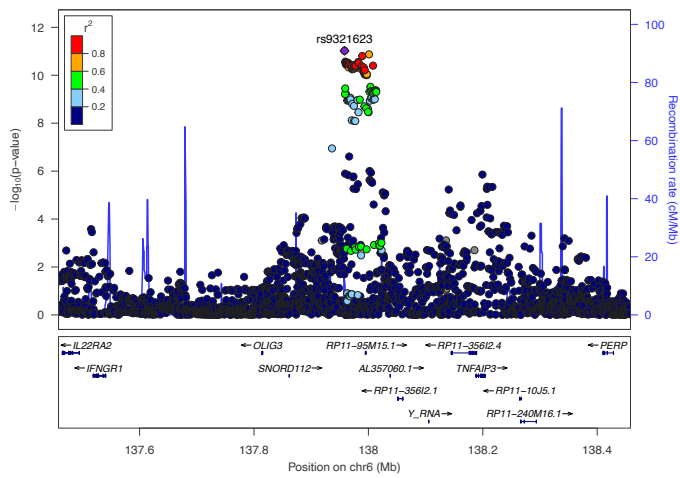

TDMA

Supplementary Figure 9: Regional association plot (equally weighted TDMA) for shared locus at 6q23.3

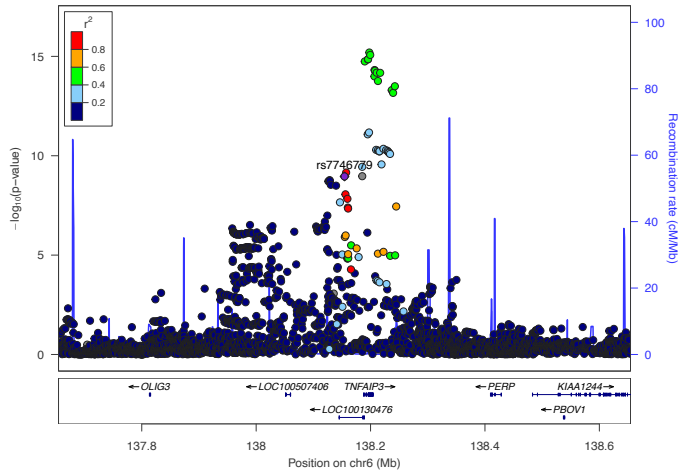

Psoriasis

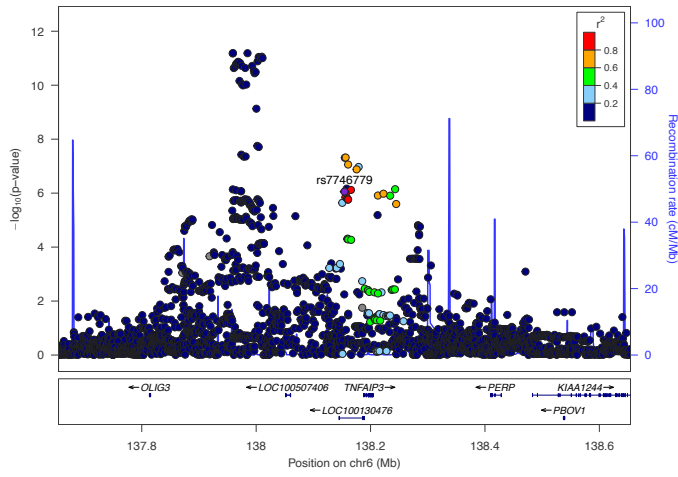

MS

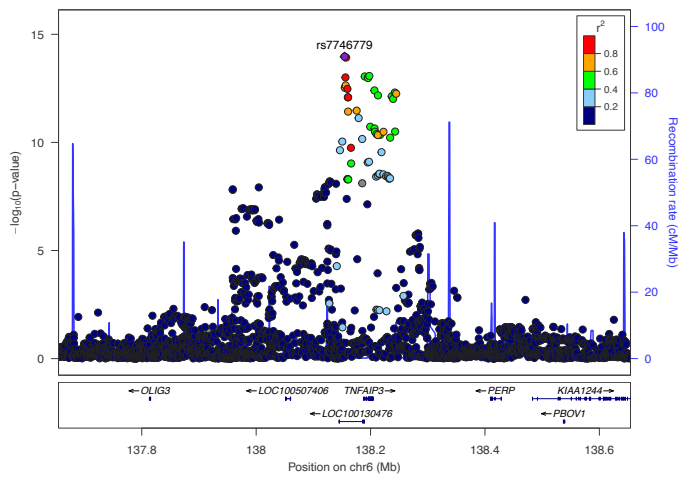

TDMA

Supplementary Figure 10: Regional association plot (IVW TDMA) for opposing locus at 6q23.3

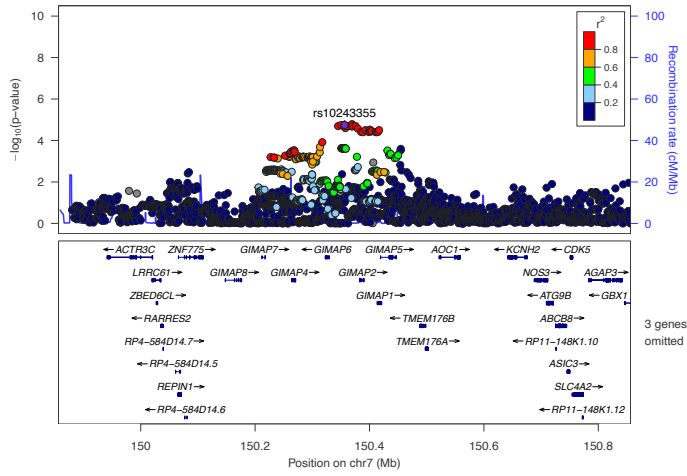

Psoriasis

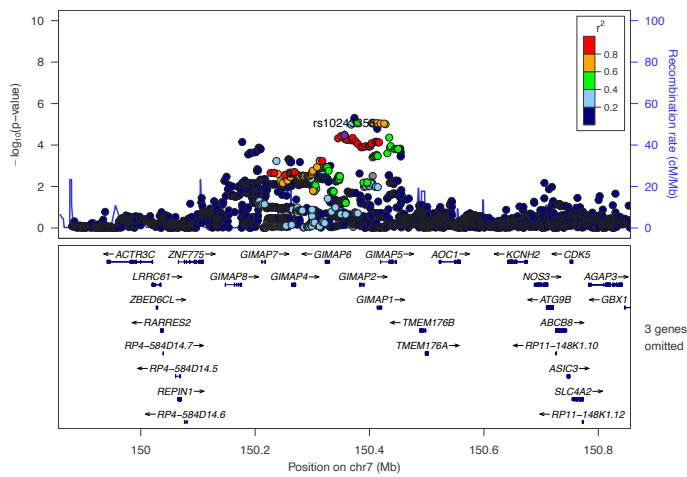

MS

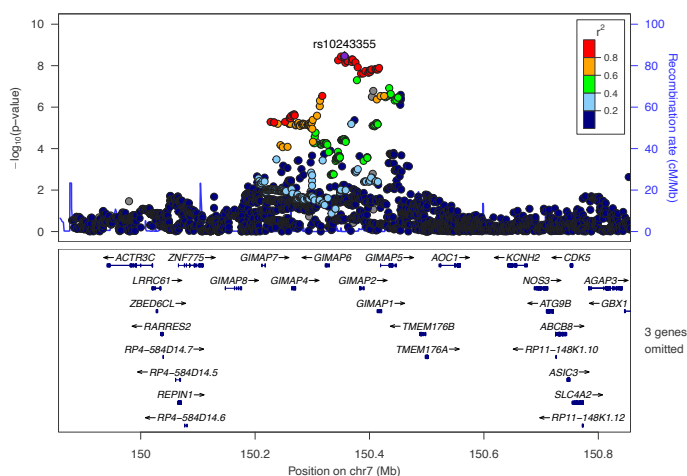

TDMA

Supplementary Figure 11: Regional association plot (equally weighted TDMA) for opposing locus at 7q36.1

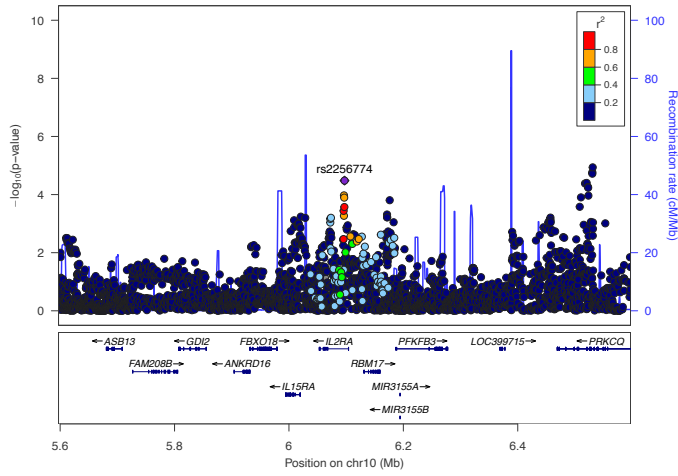

Psoriasis

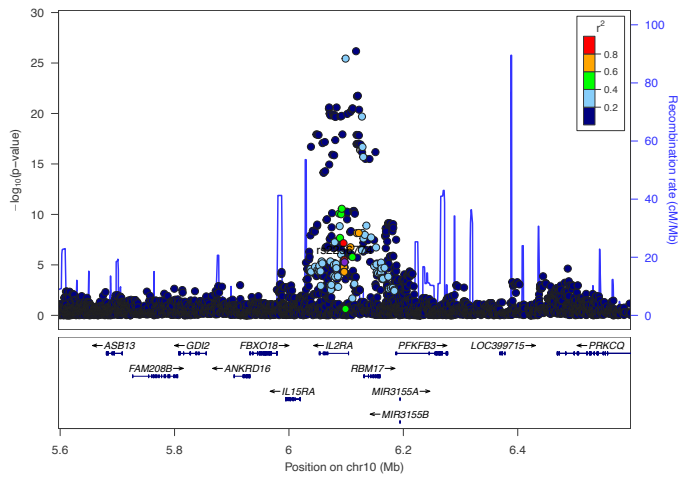

MS

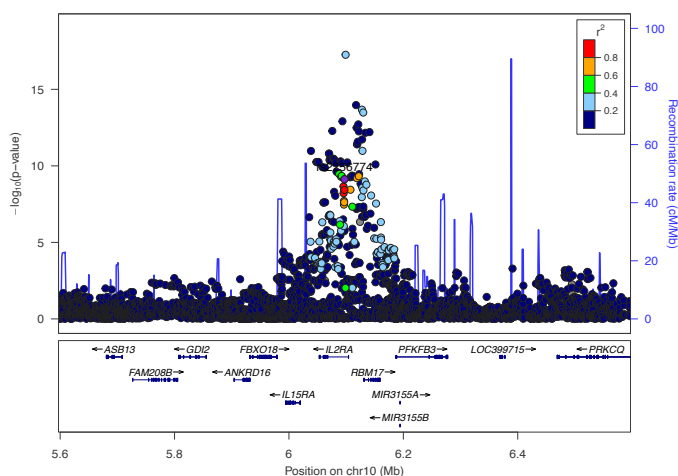

TDMA

Supplementary Figure 12: Regional association plot (IVW TDMA) for opposing locus at 10q15.1

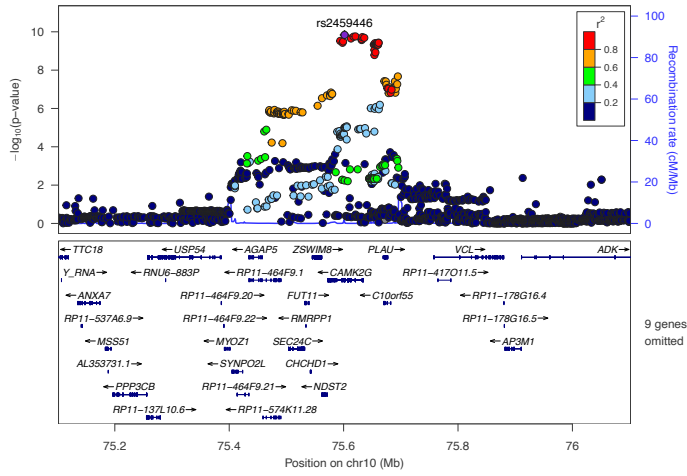

Psoriasis

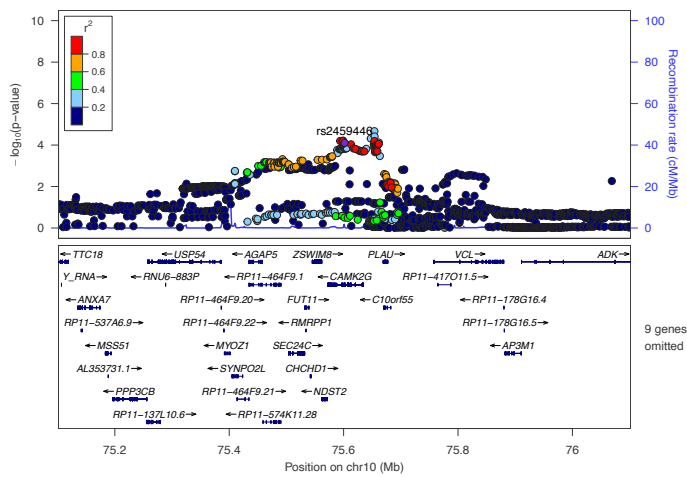

MS

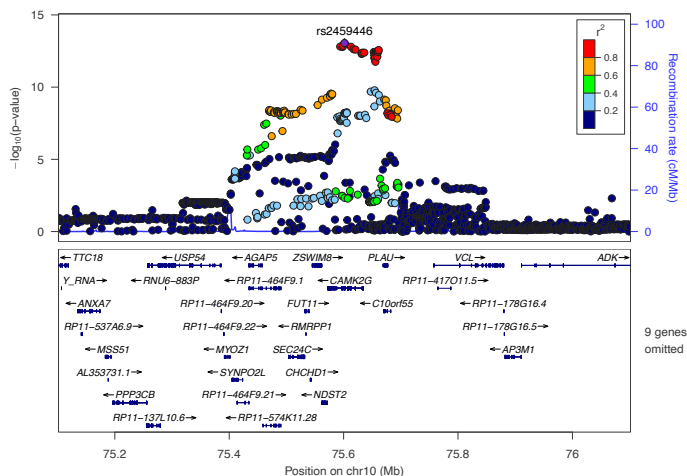

TDMA

Supplementary Figure 13: Regional association plot (equally weighted TDMA) for shared locus at 10q22.2

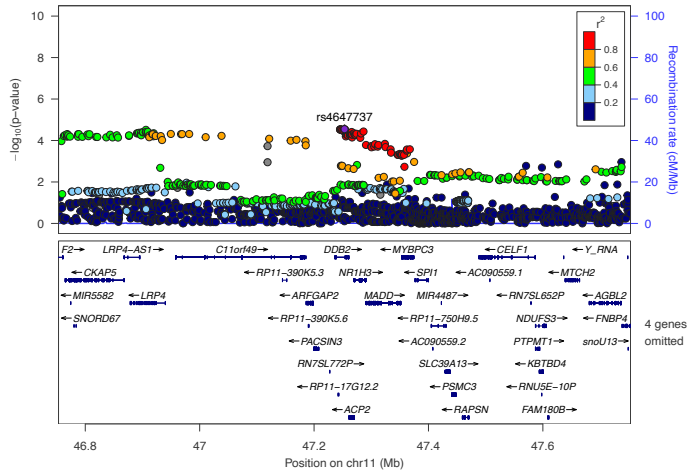

Psoriasis

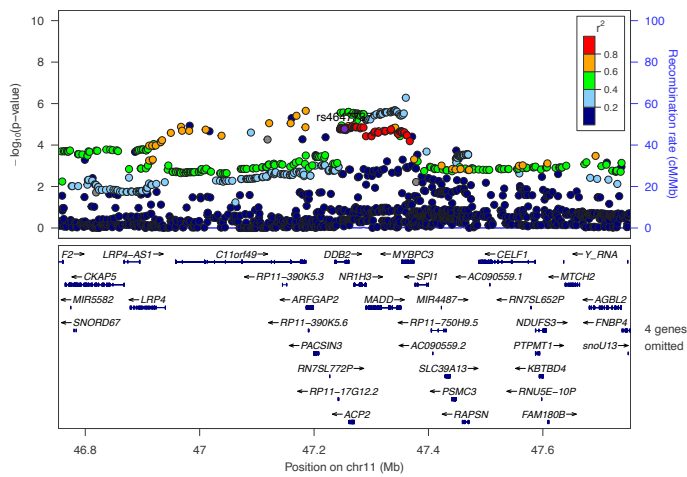

MS

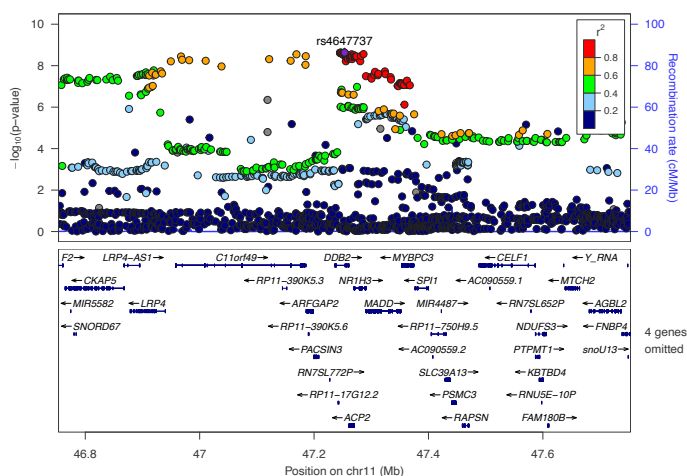

TDMA

Supplementary Figure 14: Regional association plot (equally weighted TDMA) for opposing locus at 11p11.2

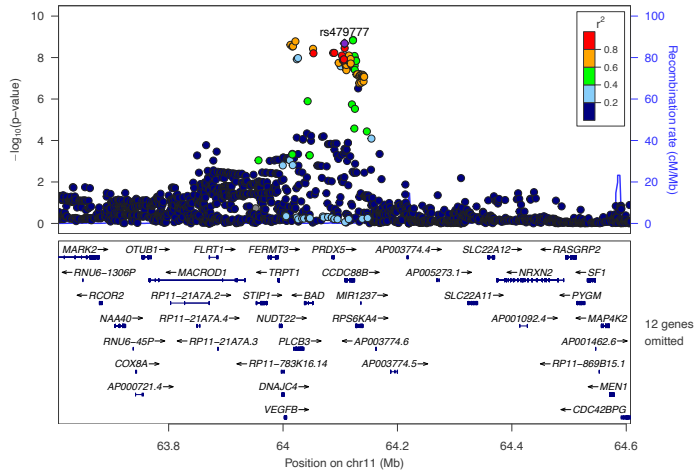

Psoriasis

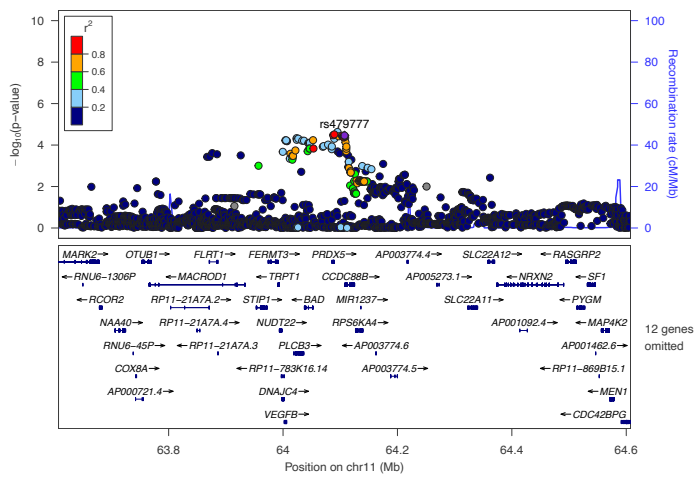

MS

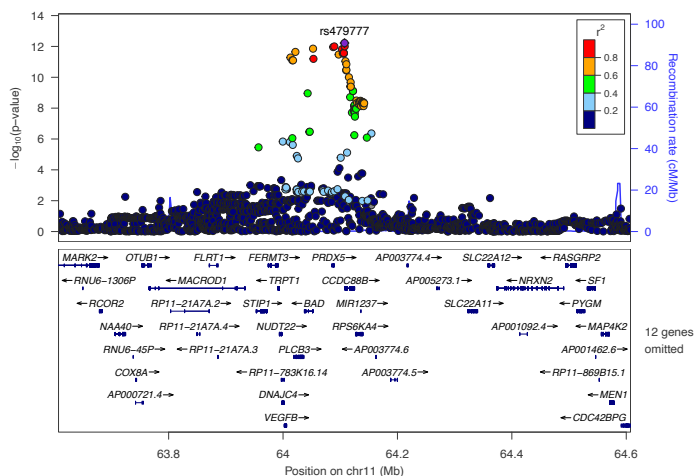

TDMA

Supplementary Figure 15: Regional association plot (equally weighted TDMA) for shared locus at 11q13.1

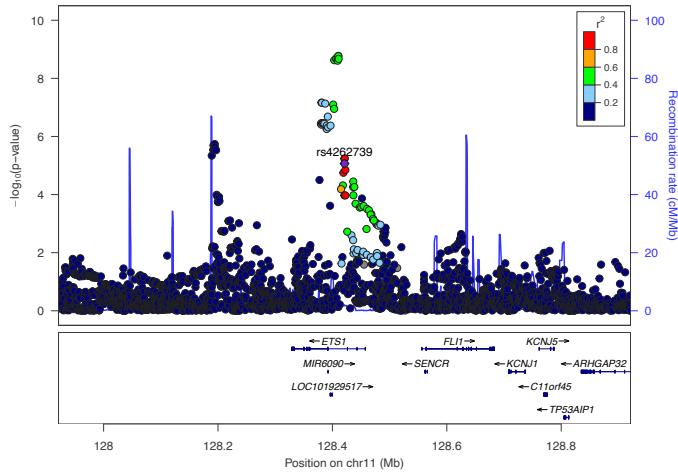

Psoriasis

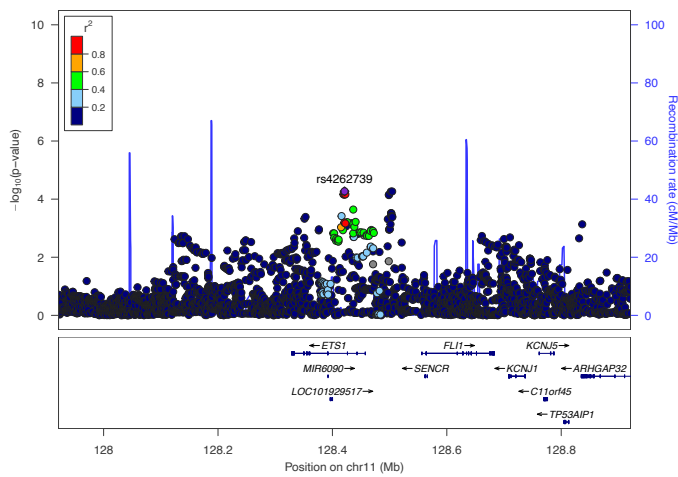

MS

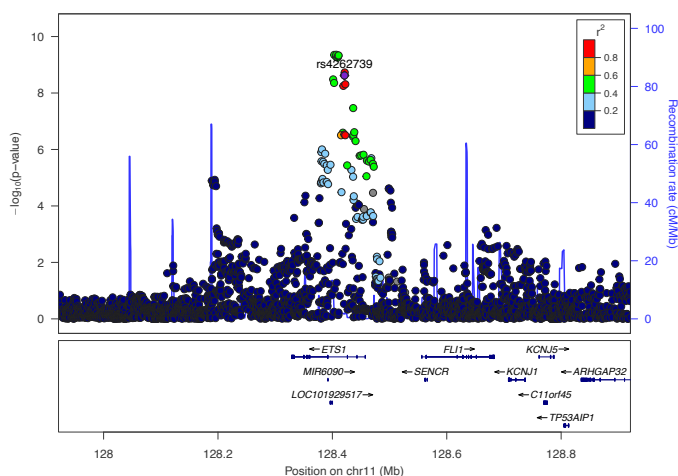

TDMA

Supplementary Figure 16: Regional association plot (IVW TDMA) for shared locus at 11q21.3



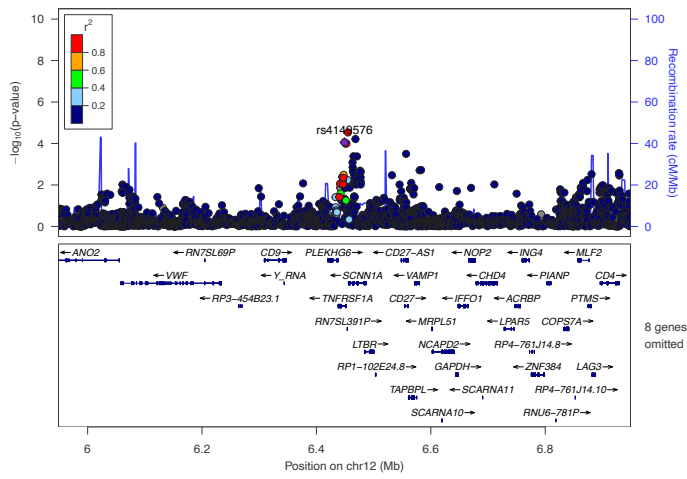

Psoriasis

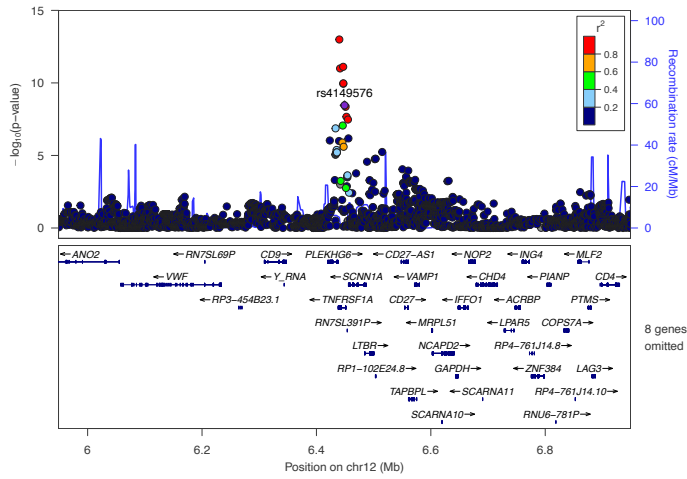

MS

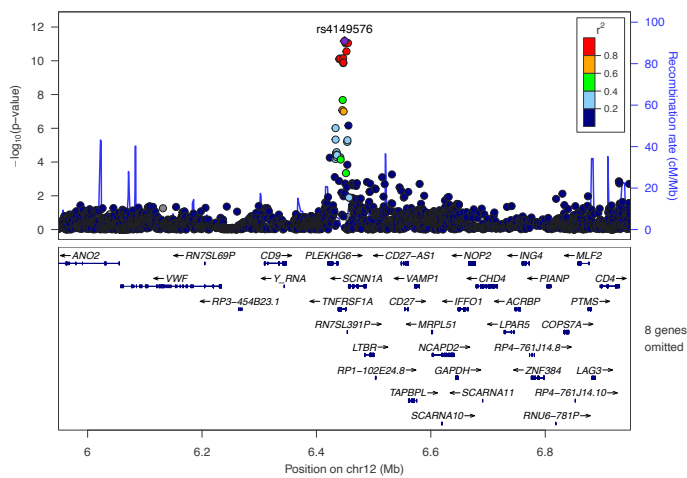

TDMA

Supplementary Figure 17: Regional association plot (equally weighted TDMA) for shared locus at 12p13.31

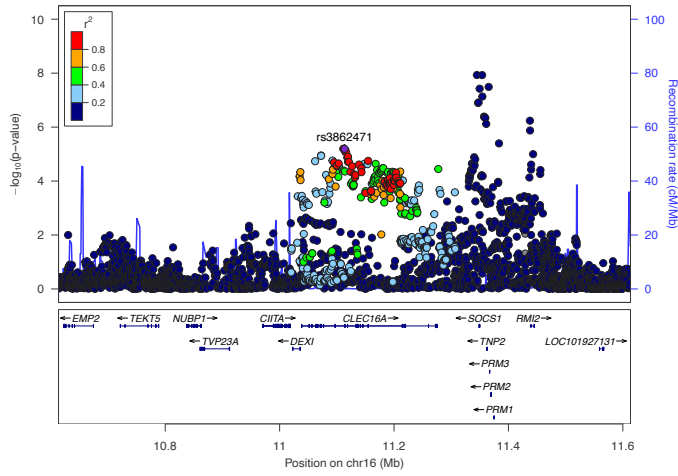

Psoriasis

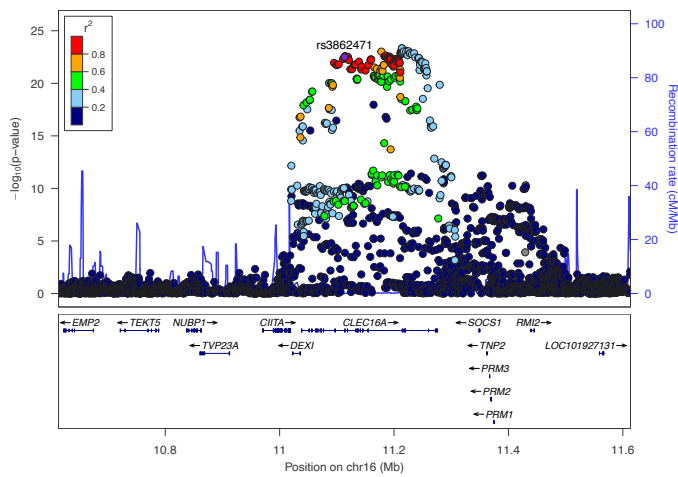

MS

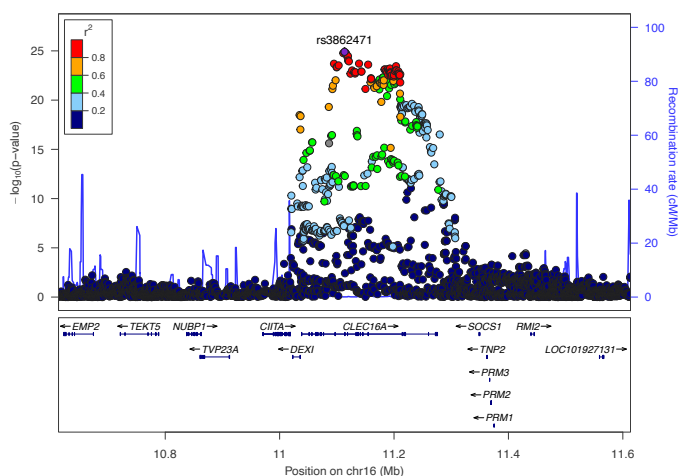

TDMA

Supplementary Figure 18: Regional association plot (IVW TDMA) for opposing locus at 16p13.13

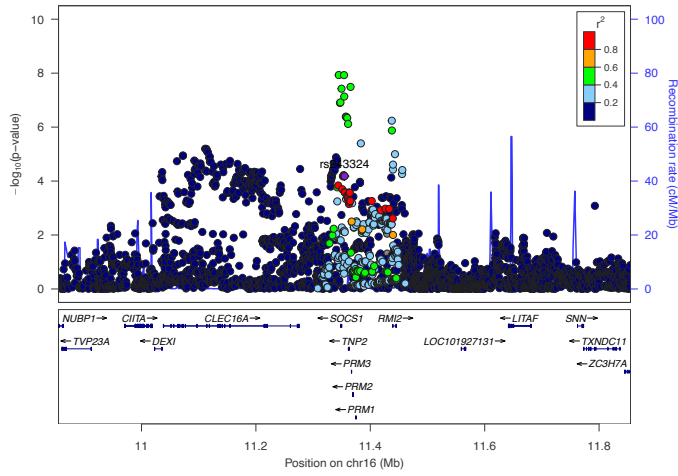

Psoriasis

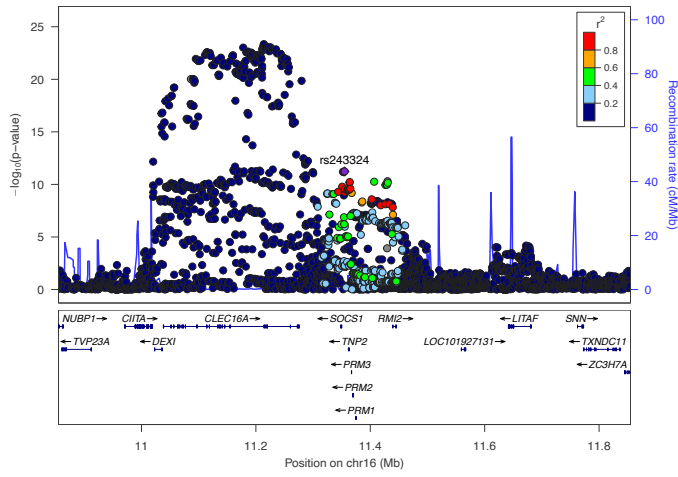

MS

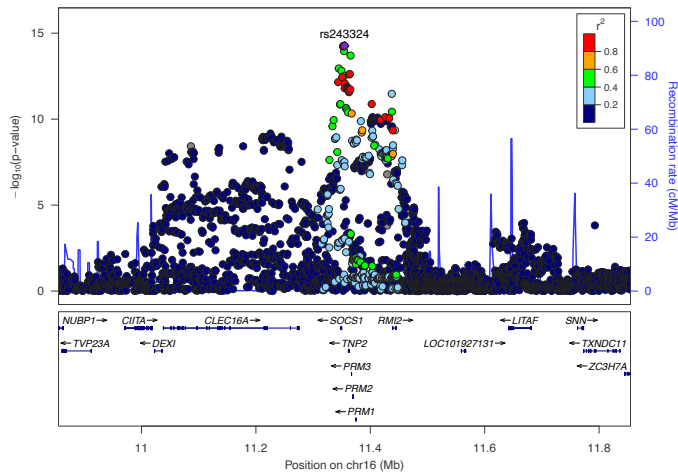

TDMA

Supplementary Figure 19: Regional association plot (IVW TDMA) for shared locus at 16p13.13

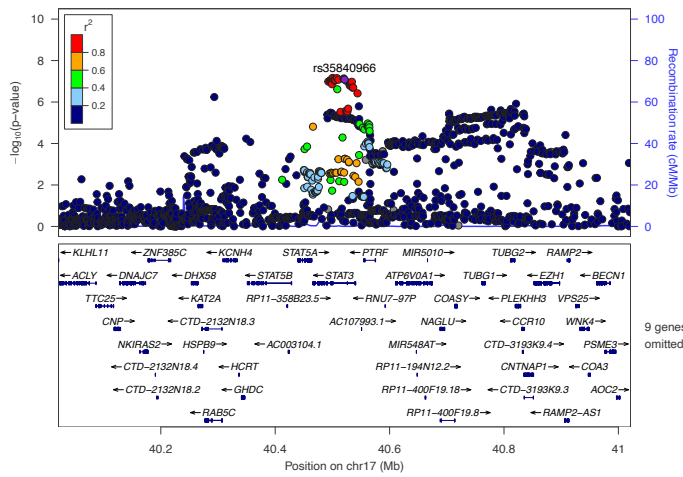

Psoriasis

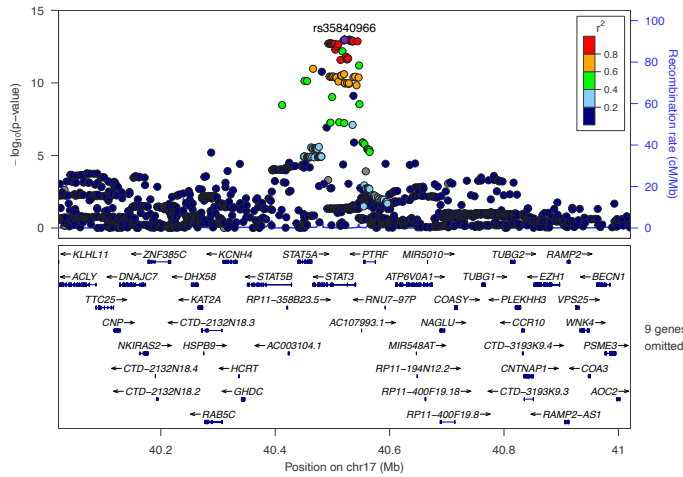

MS

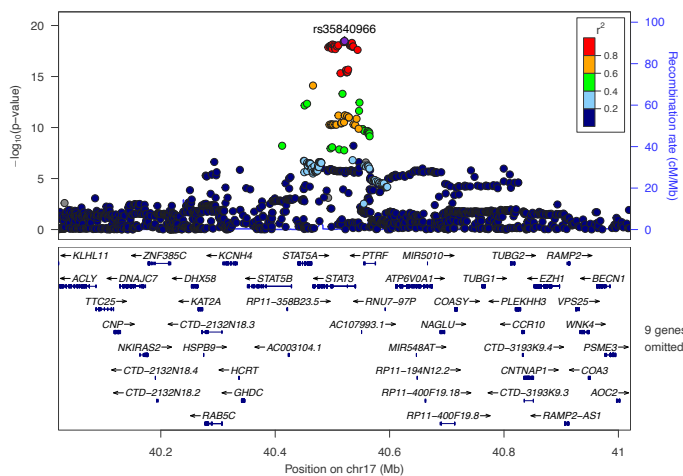

TDMA

Supplementary Figure 20: Regional association plot (equally weighted TDMA) for shared locus at 17q21.2

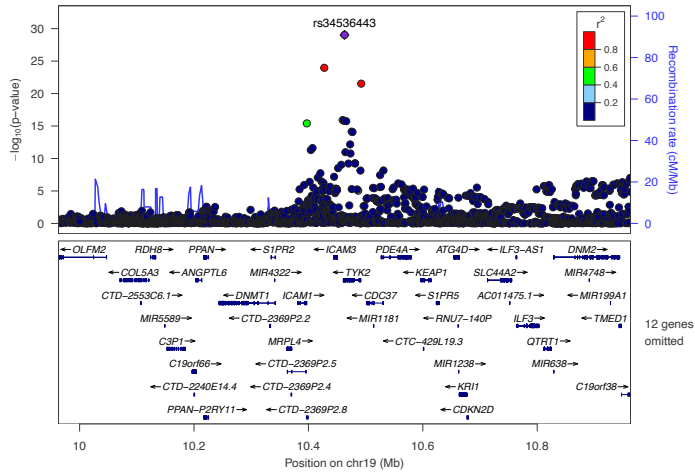

Psoriasis

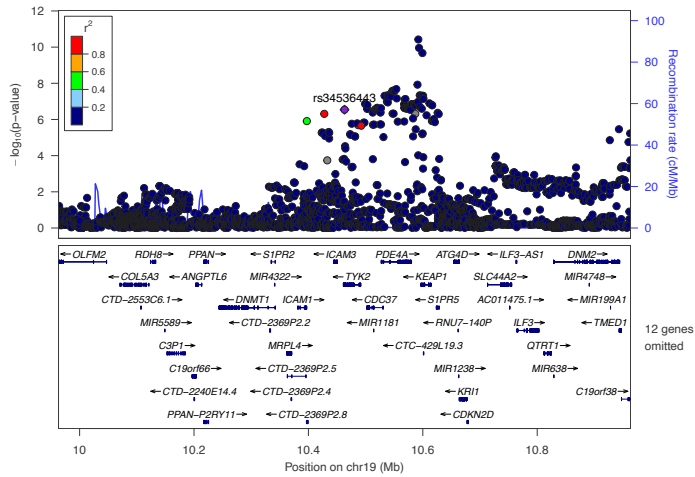

MS

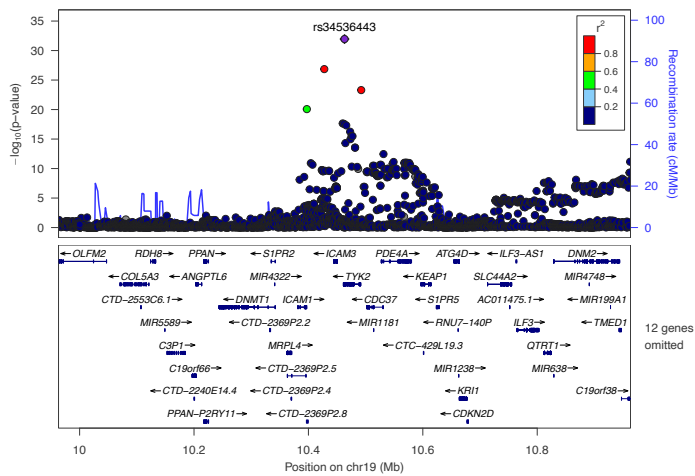

TDMA

Supplementary Figure 21: Regional association plot (equally weighted TDMA) for shared locus at 19p13.2

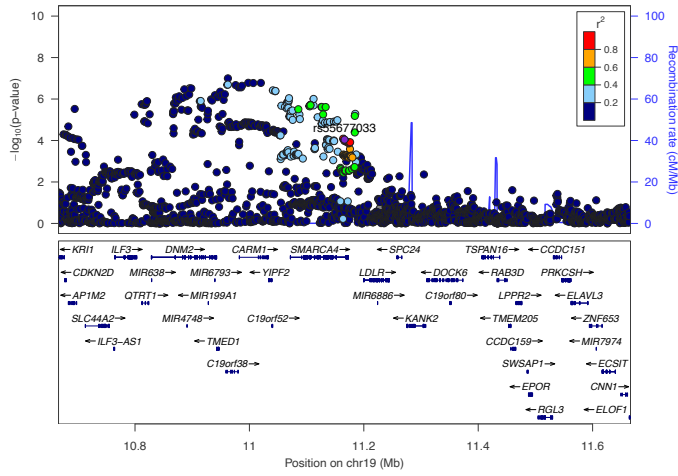

Psoriasis

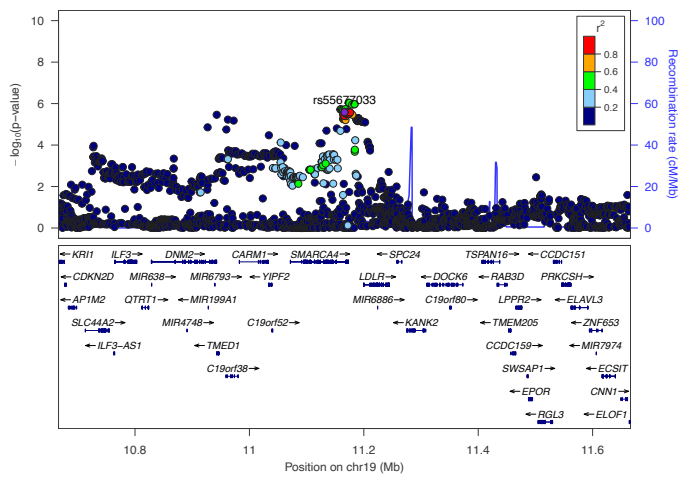

MS

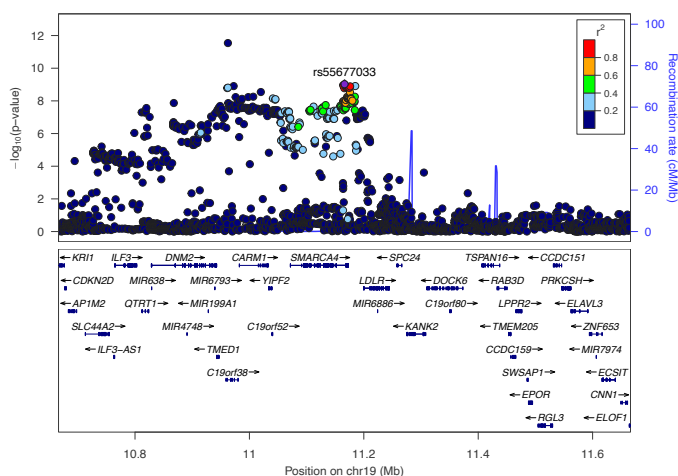

TDMA

Supplementary Figure 22: Regional association plot (IVW TDMA) for shared locus at 19p13.2

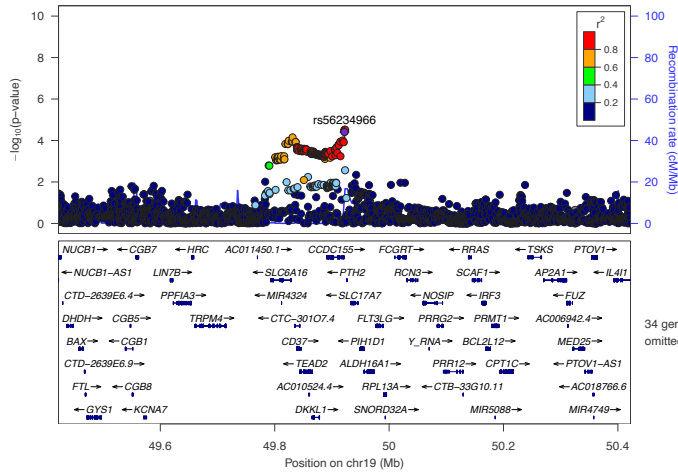

Psoriasis

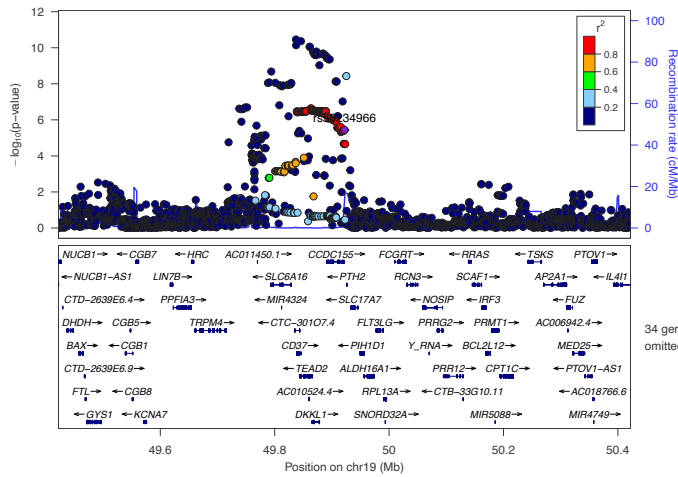

MS

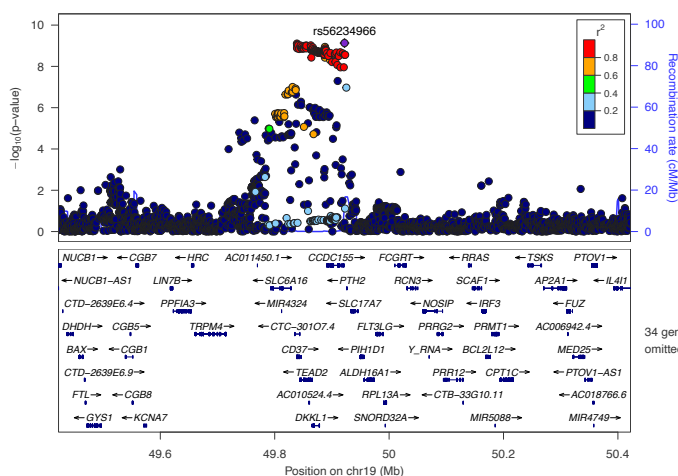

TDMA

Supplementary Figure 23: Regional association plot (equally weighted TDMA) for shared locus at 19q13.33

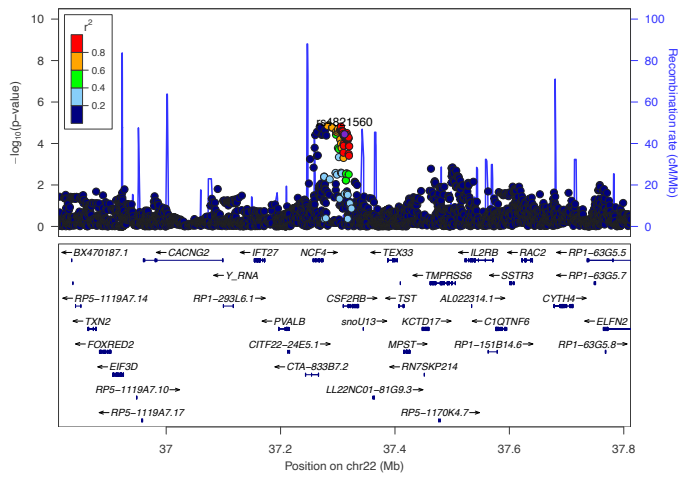

Psoriasis

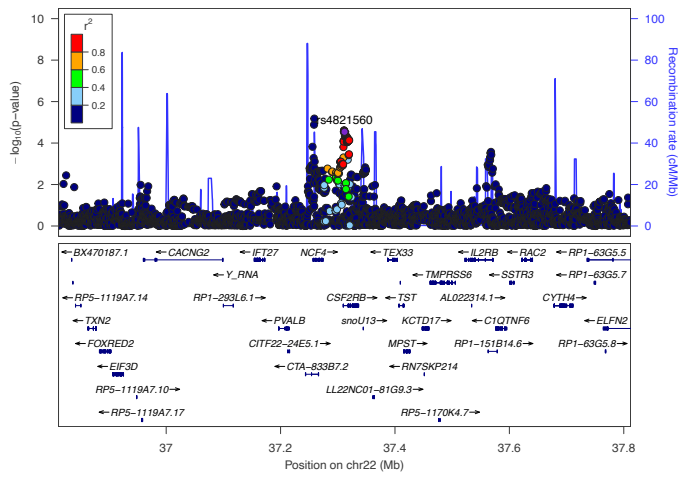

MS

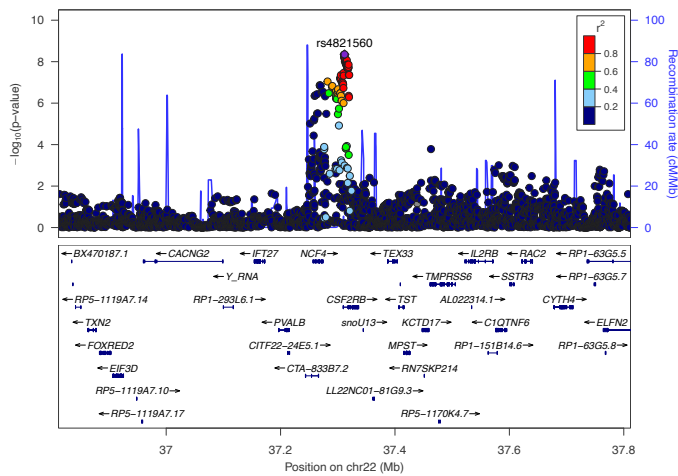

TDMA

Supplementary Figure 24: Regional association plot (equally weighted TDMA) for opposing locus at 22q12.3



**a) MR-PRESSO**

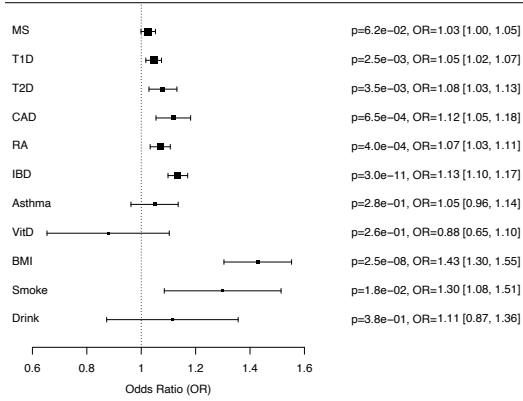

**b) MR-Egger**

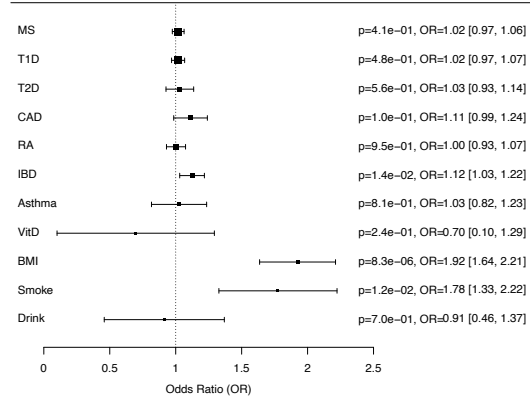

**c) MR-Robust**

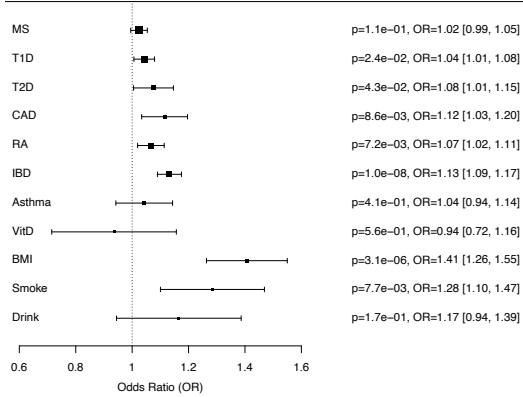

**d) MR-RAPS**

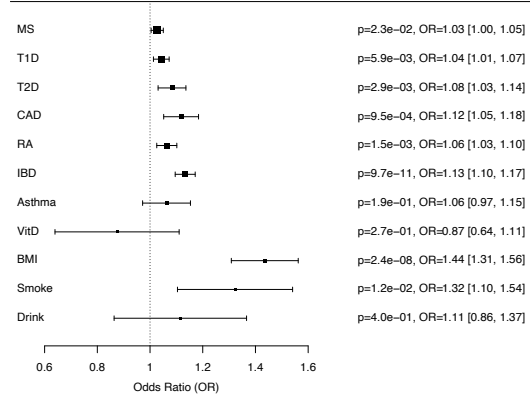

**e) MR-Median**

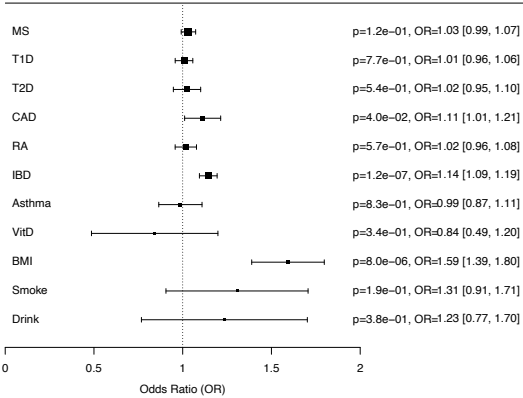

**f) MR-Mode**

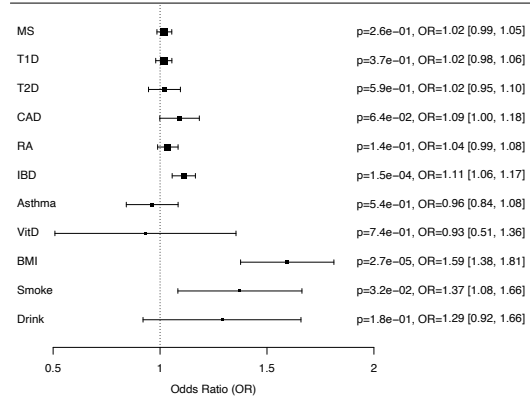

**Supplementary Figure 25: Mendelian randomization (MR) results for the effects of multiple sclerosis (MS) and other comorbidities on psoriasis.** Forest plots generated from the results of six MR techniques (a-f). Abbreviations are as follows: T1D/T2D, type 1/2 diabetes; CAD, coronary artery disease; RA,

rheumatoid arthritis; IBD, inflammatory bowel disease; VitD, vitamin D (25OHD); BMI, body mass index; Smoke, cigarettes per day; Drink, drinks per week; p, p-value; OR, odds ratio.

**Supplementary Table 1: ICD-9/10 Codes for Traits/Diseases in our Epidemiological Study**

| Trait/Disease                    | ICD-9*        | ICD-10*            |
|----------------------------------|---------------|--------------------|
| Psoriasis                        | 696.0 696.1   | L40                |
| Multiple Sclerosis (MS)          | 340           | G35                |
| Type 1 Diabetes (T1D)            | 250.*(1 3)    | E10                |
| Type 2 Diabetes (T2D)            | 250.*(0 2)    | E11                |
| Coronary Artery Disease (CAD)    | 414           | I25                |
| Rheumatoid Arthritis (RA)        | 714           | M0(5 6 8)          |
| Inflammatory Bowel Disease (IBD) | 55(5 6)       | K5(0 1)            |
| Asthma                           | 493           | J45                |
| Vitamin D Deficiency             | 268           | E55                |
| Obesity – Obese                  | 278.00 V85.3  | E66.09 E66.9 Z68.3 |
| Obesity – Morbidly Obese         | 278.01 V85.4  | E66.01 E66.2 Z68.4 |
| Smoking                          | 305.1 V158.2  | F17.21 Z878.91     |
| Alcohol Use Disorder             | 291 303 305.0 | F10                |

\*All sub-codes are also included

**Supplementary Table 2: Shared loci identified by equally weighted trans-disease meta-analysis (TDMA).** Susie # indicates the number of pairs of fine-mapped signals with evidence of colocalization (PP>0.7).

| Cyt. Band | rsID         | Position (hg19) | RA/NR | MS   |                        | Psoriasis |                        | TDMA |                        | Heterogeneity        |      | Colocalization       |         | Nearby Genes      |
|-----------|--------------|-----------------|-------|------|------------------------|-----------|------------------------|------|------------------------|----------------------|------|----------------------|---------|-------------------|
|           |              |                 |       | OR   | P                      | OR        | P                      | OR   | P                      | Q                    | P    | COLOC PP             | SUSIE # |                   |
| 5q33.3    | rs2546890    | 158759900       | A/G   | 1.12 | 1.0×10 <sup>-12</sup>  | 1.33      | 6.4×10 <sup>-51</sup>  | 1.22 | 7.1×10 <sup>-58</sup>  | 1.4×10 <sup>-2</sup> | 0.91 | 4.4×10 <sup>-7</sup> | 0       | IL12B             |
|           | rs72804018** | 158913657       | G/A   | 1.10 | 4.6×10 <sup>-7</sup>   | 1.13      | 1.8×10 <sup>-7</sup>   | 1.12 | 4.6×10 <sup>-13</sup>  | 2.2×10 <sup>-4</sup> | 0.99 | 7.8×10 <sup>-3</sup> | 3       |                   |
| 6p21.33   | rs9265746    | 31302724        | A/G   | 1.73 | 1.5×10 <sup>-108</sup> | 1.52      | 1.9×10 <sup>-102</sup> | 1.62 | 6.0×10 <sup>-207</sup> | 7.8×10 <sup>-3</sup> | 0.93 | -                    | -       | HLA-B*/C, TNF     |
| 6q23.3    | rs9321623    | 137958265       | C/T   | 1.08 | 4.5×10 <sup>-6</sup>   | 1.10      | 4.5×10 <sup>-7</sup>   | 1.09 | 9.5×10 <sup>-12</sup>  | 1.7×10 <sup>-4</sup> | 0.99 | 1.5×10 <sup>-3</sup> | 1       | TNFAIP3           |
| 7p14.1    | rs17259252   | 37382520        | G/A   | 1.08 | 8.4×10 <sup>-6</sup>   | 1.09      | 5.7×10 <sup>-6</sup>   | 1.08 | 2.1×10 <sup>-10</sup>  | 9.1×10 <sup>-5</sup> | 0.99 | 0.80                 | 3       | ELMO1*            |
| 10q22.2   | rs2459446    | 75601596        | C/T   | 1.07 | 7.9×10 <sup>-5</sup>   | 1.13      | 1.5×10 <sup>-10</sup>  | 1.10 | 8.9×10 <sup>-14</sup>  | 1.8×10 <sup>-3</sup> | 0.97 | 0.87                 | 3       | CAMK2G*           |
| 11q13.1   | rs479777     | 64107477        | T/C   | 1.08 | 3.5×10 <sup>-5</sup>   | 1.13      | 2.1×10 <sup>-9</sup>   | 1.11 | 6.0×10 <sup>-13</sup>  | 9.1×10 <sup>-4</sup> | 0.98 | 0.87                 | 0       | PRDX5*, RPS6KA4*  |
| 12p13.31  | rs4149576    | 6449115         | T/C   | 1.11 | 3.5×10 <sup>-9</sup>   | 0.07      | 8.8×10 <sup>-5</sup>   | 1.09 | 6.8×10 <sup>-12</sup>  | 3.4×10 <sup>-4</sup> | 0.99 | 0.07                 | 6       | CD27, TNFRSF1A*   |
| 13q14.2   | rs9591325    | 50811220        | T/C   | 1.24 | 4.2×10 <sup>-10</sup>  | 1.24      | 6.6×10 <sup>-9</sup>   | 1.24 | 2.0×10 <sup>-17</sup>  | 1.7×10 <sup>-5</sup> | 1.00 | 0.99                 | 2       | DLEU1*            |
| 17q21.2   | rs35840966   | 40521204        | T/C   | 1.14 | 1.1×10 <sup>-13</sup>  | 0.11      | 8.2×10 <sup>-8</sup>   | 1.13 | 3.3×10 <sup>-19</sup>  | 3.1×10 <sup>-4</sup> | 0.99 | 0.97                 | 7       | STAT3*, STAT5A*/B |
| 19p13.2   | rs34536443   | 10463118        | G/C   | 1.30 | 2.9×10 <sup>-7</sup>   | 1.95      | 9.4×10 <sup>-30</sup>  | 1.59 | 1.1×10 <sup>-32</sup>  | 8.1×10 <sup>-2</sup> | 0.78 | 0.91                 | 2       | TYK2*, CDG37      |
| 19p13.2   | rs142213240  | 10972474        | G/C   | 1.45 | 6.6×10 <sup>-6</sup>   | 1.28      | 2.2×10 <sup>-5</sup>   | 1.36 | 8.5×10 <sup>-10</sup>  | 7.4×10 <sup>-3</sup> | 0.93 | 0.91                 | 2       | ILF3, CARM1       |
| 19q13.33  | rs56234966   | 49922071        | C/T   | 1.11 | 3.7×10 <sup>-6</sup>   | 1.10      | 3.9×10 <sup>-5</sup>   | 1.10 | 7.4×10 <sup>-10</sup>  | 7.4×10 <sup>-6</sup> | 1.00 | 0.02                 | 4       | DKKL1*, SLC6A16*  |

\*eQTL evidence in eQTLGen or GTEx v8 \*\*Secondary signal identified through HESS

**Supplementary Table 3: Opposing loci identified by equally weighted trans-disease meta-analysis (TDMA). Susie # indicates the number of pairs of fine-mapped signals with evidence of colocalization (PP>0.7).**

| Cyt. Band | rsID       | Position (hg19) | RA/NR | MS   |                       | Psoriasis |                       | TDMA |                       | Heterogeneity        |      | Colocalization Prob. |       | Nearby Genes                             |
|-----------|------------|-----------------|-------|------|-----------------------|-----------|-----------------------|------|-----------------------|----------------------|------|----------------------|-------|------------------------------------------|
|           |            |                 |       | OR   | P                     | OR        | P                     | OR   | P                     | Q                    | P    | COLOC PP             | SusIE |                                          |
| 1p36.11   | rs6672420  | 25291010        | A/T   | 1.07 | 2.2×10 <sup>-5</sup>  | 0.86      | 8.8×10 <sup>-15</sup> | 1.11 | 6.3×10 <sup>-18</sup> | 1.4×10 <sup>-3</sup> | 0.97 | 0.93                 | 3     | RUNX3                                    |
| 2p16.1    | rs1177202  | 61074576        | G/C   | 0.93 | 6.1×10 <sup>-6</sup>  | 1.17      | 1.3×10 <sup>-15</sup> | 1.12 | 1.8×10 <sup>-19</sup> | 1.6×10 <sup>-3</sup> | 0.97 | 0.75                 | 6     | REL <sup>*</sup> , PUS10 <sup>*</sup>    |
| 5q31.1    | rs3843503  | 131466629       | T/A   | 1.08 | 1.9×10 <sup>-5</sup>  | 0.92      | 2.1×10 <sup>-5</sup>  | 1.08 | 1.6×10 <sup>-9</sup>  | 7.7×10 <sup>-7</sup> | 1.00 | 0.68                 | 3     | CSF2, P4HA2 <sup>*</sup>                 |
| 6q25.3    | rs2451279  | 159515077       | G/A   | 1.10 | 6.4×10 <sup>-8</sup>  | 0.91      | 3.6×10 <sup>-6</sup>  | 1.10 | 1.8×10 <sup>-12</sup> | 2.1×10 <sup>-6</sup> | 1.00 | 2.6×10 <sup>-3</sup> | 2     | TAGAP <sup>*</sup>                       |
| 7q36.1    | rs10243355 | 150356318       | G/A   | 1.09 | 3.4×10 <sup>-5</sup>  | 0.89      | 1.8×10 <sup>-5</sup>  | 1.11 | 3.4×10 <sup>-9</sup>  | 3.1×10 <sup>-4</sup> | 0.99 | 0.81                 | 1     | GIMAP2 <sup>*</sup> /6 <sup>*</sup>      |
| 10q22.3   | rs1108618  | 81043743        | G/A   | 1.11 | 5.5×10 <sup>-10</sup> | 0.89      | 6.0×10 <sup>-10</sup> | 1.12 | 2.1×10 <sup>-18</sup> | 4.9×10 <sup>-5</sup> | 0.99 | 0.83                 | 2     | ZMIZ1 <sup>*</sup>                       |
| 11p11.2   | rs4647737  | 47253244        | G/T   | 1.10 | 1.7×10 <sup>-5</sup>  | 0.90      | 2.8×10 <sup>-5</sup>  | 1.11 | 2.3×10 <sup>-9</sup>  | 5.8×10 <sup>-5</sup> | 0.99 | 0.72                 | 0     | MYBPC3 <sup>*</sup> , AGBL2 <sup>*</sup> |
| 22q12.3   | rs4821560  | 37311806        | T/G   | 1.07 | 2.9×10 <sup>-5</sup>  | 0.92      | 3.6×10 <sup>-5</sup>  | 1.08 | 4.5×10 <sup>-9</sup>  | 3.1×10 <sup>-5</sup> | 1.00 | 0.76                 | 3     | CSF2RB <sup>*</sup> , NCF4               |

\*eQTL evidence in eQTLGen or GTEx v8

**Supplementary Table 4: Shared loci identified using conditional analysis (GCTA-COJO).** The loci in red were identified by COJO but not unconditional IVW TDMA. The loci in bold were identified by COJO but not by the unconditional equally weighted TDMA.

| Cyt. Band       | rsID              | Position (hg19)  | RA/NR      | MS          |             |                            | Psoriasis   |             |                            | TDMA IVW    |             |                             | TDMA (equally weighted) |             |                             |
|-----------------|-------------------|------------------|------------|-------------|-------------|----------------------------|-------------|-------------|----------------------------|-------------|-------------|-----------------------------|-------------------------|-------------|-----------------------------|
|                 |                   |                  |            | OR          | SE          | P                          | OR          | SE          | P                          | OR          | SE          | P                           | OR                      | SE          | P                           |
| 6q23.3          | rs9321623         | 137958265        | C/T        | 1.08        | 0.02        | 4.5×10 <sup>-6</sup>       | 1.10        | 0.02        | 4.5×10 <sup>-7</sup>       | 1.09        | 0.01        | 1.2×10 <sup>-11</sup>       | 1.09                    | 0.01        | 9.5×10 <sup>-12</sup>       |
| 7p14.1          | rs17259252        | 37382520         | G/A        | 1.08        | 0.02        | 8.4×10 <sup>-6</sup>       | 1.09        | 0.02        | 5.7×10 <sup>-6</sup>       | 1.08        | 0.01        | 2.3×10 <sup>-10</sup>       | 1.08                    | 0.01        | 2.1×10 <sup>-10</sup>       |
| 10q22.2         | rs2459446         | 75601596         | C/T        | 1.07        | 0.02        | 7.9×10 <sup>-5</sup>       | 1.13        | 0.02        | 1.5×10 <sup>-10</sup>      | 1.09        | 0.01        | 7.9×10 <sup>-13</sup>       | 1.10                    | 0.01        | 8.9×10 <sup>-14</sup>       |
| <b>11q21.3</b>  | <b>rs4262739</b>  | <b>128421175</b> | <b>G/A</b> | <b>1.07</b> | <b>0.02</b> | <b>5.4×10<sup>-5</sup></b> | <b>1.09</b> | <b>0.02</b> | <b>8.6×10<sup>-6</sup></b> | <b>1.08</b> | <b>0.01</b> | <b>2.4×10<sup>-9</sup></b>  | <b>1.08</b>             | <b>0.01</b> | <b>1.9×10<sup>-9</sup></b>  |
| 12p13.31        | rs11064145        | 6455098          | G/T        | 1.11        | 0.02        | 3.4×10 <sup>-8</sup>       | 1.08        | 0.02        | 2.9×10 <sup>-5</sup>       | 1.09        | 0.01        | 6.0×10 <sup>-12</sup>       | 1.09                    | 0.01        | 8.9×10 <sup>-12</sup>       |
| 13q14.2         | rs9591325         | 50811220         | T/C        | 1.24        | 0.03        | 4.2×10 <sup>-10</sup>      | 1.24        | 0.04        | 6.6×10 <sup>-9</sup>       | 1.24        | 0.03        | 1.5×10 <sup>-17</sup>       | 1.24                    | 0.03        | 2.0×10 <sup>-17</sup>       |
| <b>16p13.13</b> | <b>rs413024</b>   | <b>11354091</b>  | <b>A/G</b> | <b>1.10</b> | <b>0.02</b> | <b>1.3×10<sup>-7</sup></b> | <b>1.13</b> | <b>0.02</b> | <b>1.2×10<sup>-8</sup></b> | <b>1.11</b> | <b>0.01</b> | <b>1.1×10<sup>-14</sup></b> | <b>1.11</b>             | <b>0.01</b> | <b>8.0×10<sup>-15</sup></b> |
| 17q21.2         | rs2306581         | 40500265         | A/C        | 1.13        | 0.02        | 2.1×10 <sup>-13</sup>      | 1.11        | 0.02        | 6.9×10 <sup>-8</sup>       | 1.12        | 0.01        | 1.0×10 <sup>-19</sup>       | 1.12                    | 0.01        | 7.3×10 <sup>-19</sup>       |
| <b>19q13.33</b> | <b>rs73053942</b> | <b>49923166</b>  | <b>T/G</b> | <b>1.10</b> | <b>0.02</b> | <b>2.2×10<sup>-5</sup></b> | <b>1.10</b> | <b>0.02</b> | <b>3.0×10<sup>-5</sup></b> | <b>1.10</b> | <b>0.02</b> | <b>2.7×10<sup>-9</sup></b>  | <b>1.10</b>             | <b>0.02</b> | <b>2.8×10<sup>-9</sup></b>  |

**Supplementary Table 5: Opposing loci identified using conditional analysis (GCTA-COJO).** The loci in red were identified by COJO but not unconditional IVW TDMA. The loci in bold were identified by COJO but not by the unconditional equally weighted TDMA.

| Cyt. Band      | rsID              | Position (hg19)  | RA/NR      | MS          |             |                            | Psoriasis   |             |                            | TDMA IVW    |             |                             | TDMA (equally weighted)       |             |                             |
|----------------|-------------------|------------------|------------|-------------|-------------|----------------------------|-------------|-------------|----------------------------|-------------|-------------|-----------------------------|-------------------------------|-------------|-----------------------------|
|                |                   |                  |            | OR          | SE          | P                          | OR          | SE          | P                          | OR          | SE          | P                           | OR                            | SE          | P                           |
| 1p36.11        | rs6672420         | 25291010         | A/T        | 1.07        | 0.02        | 2.2×10 <sup>-5</sup>       | 0.86        | 0.02        | 8.8×10 <sup>-15</sup>      | 1.11        | 0.01        | 6.3×10 <sup>-18</sup>       | 1.11                          | 0.01        | 6.3×10 <sup>-18</sup>       |
| 2p16.1         | rs35741374        | 61072567         | C/T        | 1.08        | 0.02        | 6.7×10 <sup>-6</sup>       | 0.86        | 0.02        | 1.2×10 <sup>-15</sup>      | 1.11        | 0.01        | 6.1×10 <sup>-18</sup>       | 1.12                          | 0.01        | 1.9×10 <sup>-19</sup>       |
| <b>6q23.3</b>  | <b>rs79570084</b> | <b>138160322</b> | <b>C/T</b> | <b>1.10</b> | <b>0.02</b> | <b>1.7×10<sup>-6</sup></b> | <b>0.87</b> | <b>0.03</b> | <b>4.1×10<sup>-8</sup></b> | <b>1.12</b> | <b>0.02</b> | <b>8.2×10<sup>-13</sup></b> | <b>1.13</b>                   | <b>0.02</b> | <b>3.6×10<sup>-13</sup></b> |
| 7q36.1         | rs10275417        | 150369447        | C/T        | 1.08        | 0.02        | 5.6×10 <sup>-5</sup>       | 0.89        | 0.03        | 1.6×10 <sup>-5</sup>       | 1.10        | 0.02        | 7.2×10 <sup>-9</sup>        | 1.10                          | 0.02        | 5.0×10 <sup>-9</sup>        |
| <b>10p15.1</b> | <b>rs2256774</b>  | <b>6097165</b>   | <b>C/T</b> | <b>1.08</b> | <b>0.02</b> | <b>5.4×10<sup>-6</sup></b> | <b>0.92</b> | <b>0.02</b> | <b>3.3×10<sup>-5</sup></b> | <b>1.08</b> | <b>0.01</b> | <b>7.5×10<sup>-10</sup></b> | <b>1.08</b>                   | <b>0.01</b> | <b>9.4×10<sup>-10</sup></b> |
| 10q22.3        | rs1108617         | 81043573         | G/A        | 1.11        | 0.02        | 3.6×10 <sup>-9</sup>       | 0.89        | 0.02        | 2.8×10 <sup>-10</sup>      | 1.12        | 0.01        | 8.9×10 <sup>-18</sup>       | 1.12                          | 0.01        | 6.5×10 <sup>-18</sup>       |
| 16p13.13       | rs7192287         | 11180537         | A/T        | 1.18        | 0.02        | 1.9×10 <sup>-21</sup>      | 0.92        | 0.02        | 3.3×10 <sup>-5</sup>       | 1.14        | 0.01        | 5.1×10 <sup>-23</sup>       | <i>Does not meet criteria</i> |             |                             |

**Supplementary Table 6: Colocalization using approximate Bayes factors (COLOC).** The hypothesis with the largest posterior probability in each marker is in bold.

| Lead Marker<br>(RA/NR) | Direction | Approach    | Num.<br>SNPs | Posterior Probabilities (PP)* |                       |                       |                      |                      |
|------------------------|-----------|-------------|--------------|-------------------------------|-----------------------|-----------------------|----------------------|----------------------|
|                        |           |             |              | H0                            | H1                    | H2                    | H3                   | H4                   |
| 1:25291010 (A/T)       | Opposing  | EW/IVW TDMA | 671          | 4.4×10 <sup>-11</sup>         | 7.0×10 <sup>-11</sup> | 0.03                  | 0.04                 | <b>0.93</b>          |
| 2:61074576 (G/C)       | Opposing  | EW TDMA     | 401          | 6.2×10 <sup>-13</sup>         | 4.2×10 <sup>-11</sup> | 3.6×10 <sup>-3</sup>  | 0.24                 | <b>0.75</b>          |
| 2:61079090 (A/G)       | Opposing  | IVW TDMA    | 392          | 6.0×10 <sup>-13</sup>         | 4.5×10 <sup>-11</sup> | 3.5×10 <sup>-3</sup>  | 0.26                 | <b>0.73</b>          |
| 5:131466629 (T/A)      | Opposing  | EW/IVW TDMA | 383          | 0.03                          | 0.04                  | 0.11                  | 0.14                 | <b>0.68</b>          |
| 5:158759900 (A/G)      | Shared    | EW/IVW TDMA | 456          | 3.8×10 <sup>-60</sup>         | 2.9×10 <sup>-54</sup> | 1.3×10 <sup>-6</sup>  | <b>1.0</b>           | 4.4×10 <sup>-7</sup> |
| 5:158913657 (G/A)      | Shared    | HESS        | 528          | 9.4×10 <sup>-56</sup>         | 2.8×10 <sup>-54</sup> | 0.03                  | <b>0.96</b>          | 7.8×10 <sup>-3</sup> |
| 6:42238973 (C/T)       | Shared    | IVW TDMA    | 603          | 0.07                          | 0.02                  | 0.06                  | 0.02                 | <b>0.83</b>          |
| 6:137958265 (C/T)      | Shared    | EW/IVW TDMA | 743          | 6.3×10 <sup>-9</sup>          | 0.01                  | 5.8×10 <sup>-7</sup>  | <b>0.99</b>          | 1.5×10 <sup>-3</sup> |
| 6:138154501 (A/G)      | Opposing  | IVW TDMA    | 389          | 2.2×10 <sup>-12</sup>         | 2.5×10 <sup>-10</sup> | 8.5×10 <sup>-3</sup>  | <b>0.99</b>          | 3.2×10 <sup>-3</sup> |
| 6:138160322 (C/T)      | Opposing  | COJO        | 398          | 2.2×10 <sup>-12</sup>         | 2.5×10 <sup>-10</sup> | 8.5×10 <sup>-3</sup>  | <b>0.99</b>          | 3.2×10 <sup>-3</sup> |
| 6:159515077 (G/A)      | Opposing  | EW/IVW TDMA | 710          | 7.1×10 <sup>-8</sup>          | 0.02                  | 3.6×10 <sup>-6</sup>  | <b>0.98</b>          | 2.6×10 <sup>-3</sup> |
| 7:37382520 (G/A)       | Shared    | EW TDMA     | 750          | 4.6×10 <sup>-3</sup>          | 0.10                  | 4.2×10 <sup>-3</sup>  | 0.09                 | <b>0.80</b>          |
| 7:37385365 (A/G)       | Shared    | IVW TDMA    | 758          | 4.6×10 <sup>-3</sup>          | 0.10                  | 4.2×10 <sup>-3</sup>  | 0.09                 | <b>0.80</b>          |
| 7:150356318 (G/A)      | Opposing  | EW/IVW TDMA | 842          | 0.01                          | 0.04                  | 0.03                  | 0.10                 | <b>0.81</b>          |
| 10:6097165 (C/T)       | Opposing  | COJO        | 852          | 1.1×10 <sup>-20</sup>         | <b>0.78</b>           | 2.9×10 <sup>-21</sup> | 0.21                 | 9.0×10 <sup>-3</sup> |
| 10:75601596 (C/T)      | Shared    | EW/IVW TDMA | 310          | 7.3×10 <sup>-7</sup>          | 8.0×10 <sup>-7</sup>  | 0.06                  | 0.07                 | <b>0.87</b>          |
| 10:81043743 (G/A)      | Opposing  | EW TDMA     | 730          | 5.2×10 <sup>-11</sup>         | 1.3×10 <sup>-5</sup>  | 6.8×10 <sup>-7</sup>  | 0.17                 | <b>0.83</b>          |
| 10:81047015 (A/G)      | Opposing  | IVW TDMA    | 737          | 5.2×10 <sup>-11</sup>         | 1.3×10 <sup>-5</sup>  | 6.8×10 <sup>-7</sup>  | 0.17                 | <b>0.83</b>          |
| 11:47169228 (C/G)      | Opposing  | IVW TDMA    | 328          | 4.9×10 <sup>-3</sup>          | 0.04                  | 7.3×10 <sup>-3</sup>  | 0.06                 | <b>0.88</b>          |
| 11:47253244 (G/T)      | Opposing  | EW TDMA     | 392          | 3.2×10 <sup>-3</sup>          | 0.09                  | 6.1×10 <sup>-3</sup>  | 0.18                 | <b>0.72</b>          |
| 11:64107477 (T/C)      | Shared    | EW/IVW TDMA | 348          | 8.4×10 <sup>-6</sup>          | 8.9×10 <sup>-6</sup>  | 0.07                  | 0.07                 | <b>0.87</b>          |
| 11:128421175 (G/A)     | Shared    | COJO        | 469          | 1.3×10 <sup>-4</sup>          | 5.0×10 <sup>-5</sup>  | <b>0.47</b>           | 0.19                 | 0.35                 |
| 12:6449115 (T/C)       | Shared    | EW/IVW TDMA | 565          | 1.0×10 <sup>-7</sup>          | <b>0.78</b>           | 2.1×10 <sup>-8</sup>  | 0.15                 | 0.07                 |
| 13:50811220 (T/C)      | Shared    | EW/IVW TDMA | 502          | 1.0×10 <sup>-9</sup>          | 1.0×10 <sup>-5</sup>  | 6.6×10 <sup>-7</sup>  | 5.3×10 <sup>-3</sup> | <b>0.99</b>          |
| 16:11113463 (G/T)      | Opposing  | IVW TDMA    | 545          | 2.8×10 <sup>-20</sup>         | 0.02                  | 1.6×10 <sup>-19</sup> | 0.13                 | <b>0.85</b>          |
| 16:11354970 (A/G)      | Shared    | IVW TDMA    | 794          | 7.9×10 <sup>-19</sup>         | 3.0×10 <sup>-3</sup>  | 2.6×10 <sup>-16</sup> | <b>1.0</b>           | 3.1×10 <sup>-4</sup> |
| 16:11354091 (A/G)      | Shared    | COJO        | 795          | 3.3×10 <sup>-19</sup>         | 3.0×10 <sup>-3</sup>  | 1.1×10 <sup>-16</sup> | <b>1.0</b>           | 2.6×10 <sup>-4</sup> |
| 17:40519890 (A/G)      | Shared    | IVW TDMA    | 412          | 6.4×10 <sup>-13</sup>         | 8.4×10 <sup>-5</sup>  | 2.3×10 <sup>-10</sup> | 0.03                 | <b>0.97</b>          |
| 17:40521204 (T/C)      | Shared    | EW TDMA     | 412          | 6.4×10 <sup>-13</sup>         | 8.4×10 <sup>-5</sup>  | 2.3×10 <sup>-10</sup> | 0.03                 | <b>0.97</b>          |
| 19:10463118 (G/C)      | Shared    | EW TDMA     | 506          | 1.3×10 <sup>-25</sup>         | 6.9×10 <sup>-23</sup> | 1.6×10 <sup>-4</sup>  | 0.09                 | <b>0.91</b>          |
| 19:10972474 (G/C)      | Shared    | EW TDMA     | 354          | 2.2×10 <sup>-4</sup>          | 4.4×10 <sup>-4</sup>  | 0.03                  | 0.06                 | <b>0.91</b>          |
| 19:11166293 (T/C)      | Shared    | IVW TDMA    | 638          | 1.0×10 <sup>-3</sup>          | 0.04                  | 0.02                  | <b>0.77</b>          | 0.17                 |
| 19:49922071 (C/T)      | Shared    | EW TDMA     | 482          | 3.1×10 <sup>-6</sup>          | 0.47                  | 3.4×10 <sup>-6</sup>  | <b>0.52</b>          | 0.02                 |
| 22:37310954 (A/G)      | Opposing  | IVW TDMA    | 812          | 0.02                          | 0.03                  | 0.07                  | 0.12                 | <b>0.76</b>          |

|                   |          |         |     |      |      |      |      |             |
|-------------------|----------|---------|-----|------|------|------|------|-------------|
| 22:37311806 (T/G) | Opposing | EW TDMA | 817 | 0.02 | 0.03 | 0.07 | 0.12 | <b>0.76</b> |
|-------------------|----------|---------|-----|------|------|------|------|-------------|

\***H0**: No association with either trait; **H1**: Association with MS, not with psoriasis; **H2**: Association with psoriasis, not with MS;  
**H3**: Association with both traits, two independent SNPs; **H4**: Association with both traits, one shared SNP.



**Supplementary Table 7: Colocalization using sum of single effects (SuSE)**

| Lead Marker (RA/NR) | Colocalized Marker (RA/NR) | Posterior Probabilities (PP) |           |           |                       |             |
|---------------------|----------------------------|------------------------------|-----------|-----------|-----------------------|-------------|
|                     |                            | <i>H0</i>                    | <i>H1</i> | <i>H2</i> | <i>H3</i>             | <i>H4</i>   |
| 5:158913657 (G/A)   | 5:158857072 (T/C)          | 0.00                         | 0.00      | 0.00      | $1.2 \times 10^{-13}$ | <b>1.00</b> |
|                     | 5:158857472 (C/T)          | 0.00                         | 0.00      | 0.00      | 0.00                  | <b>1.00</b> |
|                     | 5:158857873 (C/A)          | 0.00                         | 0.00      | 0.00      | 0.00                  | <b>1.00</b> |
| 6:137958265 (C/T)   | 6:137979971 (T/C)          | 0.00                         | 0.00      | 0.00      | $7.8 \times 10^{-4}$  | <b>1.00</b> |
| 6:159515077 (G/A)   | 6:159506600 (T/C)          | 0.00                         | 0.00      | 0.00      | 0.00                  | <b>1.00</b> |
|                     | 6:159507026 (T/C)          | 0.00                         | 0.00      | 0.00      | 0.00                  | <b>1.00</b> |
| 12:6449115 (T/C)    | 12:6441348 (G/C)           | 0.00                         | 0.00      | 0.00      | 0.00                  | <b>1.00</b> |
|                     | 12:6444963 (G/C)           | 0.00                         | 0.00      | 0.00      | 0.00                  | <b>1.00</b> |
|                     | 12:6445329 (C/G)           | 0.00                         | 0.00      | 0.00      | 0.00                  | <b>1.00</b> |
|                     | 12:6447437 (C/T)           | 0.00                         | 0.00      | 0.00      | 0.00                  | <b>1.00</b> |
|                     | 12:6447522 (A/G)           | 0.00                         | 0.00      | 0.00      | 0.00                  | <b>1.00</b> |
|                     | 12:6449115 (T/C)           | 0.00                         | 0.00      | 0.00      | 0.00                  | <b>1.00</b> |
| 19:49922071 (C/T)   | 19:49838891 (A/C)          | 0.00                         | 0.00      | 0.00      | 0.00                  | <b>1.00</b> |
|                     | 19:49839283 (A/G)          | 0.00                         | 0.00      | 0.00      | $2.0 \times 10^{-3}$  | <b>1.00</b> |
|                     | 19:49841054 (T/G)          | 0.00                         | 0.00      | 0.00      | 0.00                  | <b>1.00</b> |
|                     | 19:49845244 (A/T)          | 0.00                         | 0.00      | 0.00      | $7.7 \times 10^{-8}$  | <b>1.00</b> |

**Supplementary Table 8: Genetic associations with comorbidities of psoriasis and/or MS.** The odds ratios (OR) are with respect to the TDMA risk alleles. The Direction column indicates whether the risk allele of the TDMA shared signal would increase or decrease the comorbidity; for the opposing loci, it indicates whether the risk allele of the comorbidity would align with the risk allele of psoriasis or MS.  
<sup>1</sup>Restricting to European individuals

| Study Details              |                                              |                                                                                                                       | Associations with TDMA Loci                          |             |                       |      |           |
|----------------------------|----------------------------------------------|-----------------------------------------------------------------------------------------------------------------------|------------------------------------------------------|-------------|-----------------------|------|-----------|
| Trait                      | Sample Size                                  | PubMed                                                                                                                | Position (hg19)                                      | rsID        | P-value               | OR   | Direction |
| Body mass index            | 806,834 individuals                          | 30239722                                                                                                              | 11:47253244                                          | rs4647737   | 1.4×10 <sup>-7</sup>  | 1.01 | Psoriasis |
|                            |                                              |                                                                                                                       | 13:50811220                                          | rs9591325   | 9.8×10 <sup>-15</sup> | 1.03 | Increase  |
| Coronary artery disease    | 122,733 cases<br>424,528 controls            | 29212778                                                                                                              | 19:10972474                                          | rs142213240 | 3.0×10 <sup>-12</sup> | 1.10 | Increase  |
| Inflammatory bowel disease | 25,042 cases<br>34,915 controls              | 28067908                                                                                                              | 5:131466629                                          | rs3843503   | 2.3×10 <sup>-16</sup> | 1.11 | Psoriasis |
|                            |                                              |                                                                                                                       | 10:75601596                                          | rs2459446   | 3.6×10 <sup>-7</sup>  | 1.07 | Increase  |
|                            |                                              |                                                                                                                       | 10:81043743                                          | rs1108618   | 4.2×10 <sup>-11</sup> | 1.09 | Psoriasis |
|                            |                                              |                                                                                                                       | 16:11354091                                          | rs413024    | 2.7×10 <sup>-7</sup>  | 1.07 | Increase  |
|                            |                                              |                                                                                                                       | 17:40521204                                          | rs35840966  | 1.9×10 <sup>-15</sup> | 0.90 | Decrease  |
| Type 1 diabetes            | 18,942 cases<br>501,638 control              | 34012112                                                                                                              | 1:25291010                                           | rs6672420   | 1.7×10 <sup>-7</sup>  | 1.08 | Psoriasis |
|                            |                                              |                                                                                                                       | 6:138160322                                          | rs79570084  | 6.1×10 <sup>-7</sup>  | 1.09 | MS        |
|                            |                                              |                                                                                                                       | 6:159515077                                          | rs2451279   | 7.2×10 <sup>-6</sup>  | 1.07 | MS        |
|                            |                                              |                                                                                                                       | 10:6097165                                           | rs2256774   | 8.5×10 <sup>-5</sup>  | 1.06 | Psoriasis |
|                            |                                              |                                                                                                                       | 11:64107477                                          | rs479777    | 4.7×10 <sup>-11</sup> | 1.10 | Increase  |
|                            |                                              |                                                                                                                       | 16:11354091                                          | rs413024    | 9.0×10 <sup>-7</sup>  | 1.08 | Increase  |
|                            |                                              |                                                                                                                       | 19:10463118                                          | rs34536443  | 1.5×10 <sup>-23</sup> | 1.47 | Increase  |
| Type 2 diabetes            | 74,124 cases<br>824,006 controls             | 30297969                                                                                                              | No significant / suggestive significant associations |             |                       |      |           |
| Asthma                     | 69,189 cases<br>702,199 controls             | 31959851                                                                                                              | 5:131466629                                          | rs3843503   | 1.6×10 <sup>-11</sup> | 1.04 | MS        |
|                            |                                              |                                                                                                                       | 10:6097165                                           | rs2256774   | 8.2×10 <sup>-5</sup>  | 1.03 | Psoriasis |
|                            |                                              |                                                                                                                       | 11:128421175                                         | rs4262739   | 8.5×10 <sup>-5</sup>  | 1.03 | Increase  |
| Rheumatoid arthritis       | 22,350 cases<br>74,823 controls <sup>1</sup> | Preprint<br>( <a href="https://doi.org/10.1101/2021.12.01.21267132">https://doi.org/10.1101/2021.12.01.21267132</a> ) | 2:61074576                                           | rs1177202   | 2.0×10 <sup>-8</sup>  | 1.07 | Psoriasis |
|                            |                                              |                                                                                                                       | 6:159515077                                          | rs2451279   | 8.5×10 <sup>-11</sup> | 1.09 | MS        |
|                            |                                              |                                                                                                                       | 10:81043743                                          | rs1108618   | 3.5×10 <sup>-5</sup>  | 1.04 | MS        |
|                            |                                              |                                                                                                                       | 11:64107477                                          | rs479777    | 1.4×10 <sup>-11</sup> | 1.08 | Increase  |
|                            |                                              |                                                                                                                       | 16:11354091                                          | rs413024    | 7.6×10 <sup>-5</sup>  | 1.05 | Increase  |
|                            |                                              |                                                                                                                       | 19:10463118                                          | rs34536443  | 5.5×10 <sup>-21</sup> | 1.56 | Increase  |
|                            |                                              |                                                                                                                       | 22:37311806                                          | rs4821560   | 4.4×10 <sup>-9</sup>  | 1.06 | Psoriasis |
| Drinks per week            | 537,349 individuals                          | 30643251                                                                                                              | No significant / suggestive significant associations |             |                       |      |           |
| Cigarettes per day         | 263,954 individuals                          | 30643251                                                                                                              | No significant / suggestive significant associations |             |                       |      |           |
| Vitamin D (25OHD)          | 443,734 individuals                          | 32059762                                                                                                              | No significant / suggestive significant associations |             |                       |      |           |

**Supplementary Table 9: Enrichment of H3K27ac marks for active enhancers.** Cell types with significant enrichment (adjusting for FDR) are colored in red. Abbreviations are as follows: N, number of loci overlapping active enhancer mark (out of 23 loci for equally weighted TDMA, 62 for MS TDMA-removed and 25 for psoriasis TDMA-removed, outside the MHC); Duodenum muc., Duodenum mucosa; Hippocampus m., Hippocampus middle; Inferior t. lobe, Inferior temporal lobe; Chondrogenic d., Chondrogenic diff.

| TDMA Loci         |    |                       | MS Loci (TDMA Removed) |    |                       | Psoriasis Loci (TDMA Removed) |   |         |
|-------------------|----|-----------------------|------------------------|----|-----------------------|-------------------------------|---|---------|
| Cell type         | N  | P-value               | Cell type              | N  | P-value               | Cell type                     | N | P-value |
| B centroblast     | 12 | 7.7×10 <sup>-12</sup> | T (reg)                | 23 | 1.1×10 <sup>-14</sup> | Lymphoblastoid                | 6 | 4.4E-04 |
| Lymphoblastoid    | 11 | 6.7×10 <sup>-9</sup>  | Th0                    | 21 | 6.8×10 <sup>-14</sup> | Colonic mucosa                | 6 | 1.3E-03 |
| Th0               | 10 | 1.5×10 <sup>-8</sup>  | Th1                    | 20 | 2.5×10 <sup>-13</sup> | Monocytes                     | 6 | 1.7E-03 |
| Th17              | 10 | 2.1×10 <sup>-8</sup>  | Th2                    | 19 | 2.0×10 <sup>-12</sup> | Pancreatic islets             | 6 | 2.0E-03 |
| Th2               | 9  | 1.2×10 <sup>-7</sup>  | Th17                   | 19 | 1.4×10 <sup>-11</sup> | B cell                        | 5 | 2.2E-03 |
| Th1               | 9  | 1.4×10 <sup>-7</sup>  | Th (stim)              | 21 | 1.8×10 <sup>-11</sup> | HSMM                          | 5 | 9.6E-03 |
| B cell            | 9  | 6.4×10 <sup>-7</sup>  | Lymphoblastoid         | 20 | 3.0×10 <sup>-11</sup> | Th17                          | 4 | 0.011   |
| T (naïve)         | 9  | 6.6×10 <sup>-7</sup>  | T (mem)                | 18 | 8.1×10 <sup>-11</sup> | T (naïve)                     | 4 | 0.014   |
| Th (stim)         | 9  | 2.8×10 <sup>-6</sup>  | CD8+ (mem)             | 17 | 2.5×10 <sup>-9</sup>  | T (reg)                       | 4 | 0.016   |
| T (mem)           | 8  | 3.3×10 <sup>-6</sup>  | Monocytes              | 20 | 2.9×10 <sup>-19</sup> | Duodenum muc.                 | 4 | 0.022   |
| T (reg)           | 8  | 9.9×10 <sup>-6</sup>  | B cell                 | 17 | 3.9×10 <sup>-9</sup>  | Th (stim)                     | 4 | 0.026   |
| Monocytes         | 9  | 1.1×10 <sup>-5</sup>  | T (naïve)              | 17 | 4.2×10 <sup>-9</sup>  | Kidney                        | 4 | 0.030   |
| Liver             | 8  | 4.7×10 <sup>-5</sup>  | B centroblast          | 13 | 4.6×10 <sup>-7</sup>  | Liver                         | 4 | 0.032   |
| CD8+ (mem)        | 7  | 6.3×10 <sup>-5</sup>  | CD8+ (naïve)           | 12 | 5.9×10 <sup>-7</sup>  | B centroblast                 | 3 | 0.038   |
| Colonic mucosa    | 8  | 6.4×10 <sup>-5</sup>  | Colonic mucosa         | 16 | 1.5×10 <sup>-6</sup>  | Th2                           | 3 | 0.043   |
| CD8+ (naïve)      | 6  | 7.0×10 <sup>-5</sup>  | Duodenum muc.          | 13 | 2.6×10 <sup>-5</sup>  | Th1                           | 3 | 0.045   |
| Duodenum muc.     | 7  | 1.7×10 <sup>-4</sup>  | Liver                  | 12 | 3.8×10 <sup>-4</sup>  | Th0                           | 3 | 0.053   |
| Mid-frontal lobe  | 8  | 1.9×10 <sup>-4</sup>  | HepG2                  | 10 | 8.0×10 <sup>-4</sup>  | T (mem)                       | 3 | 0.053   |
| CD34+ (PB)        | 6  | 3.6×10 <sup>-4</sup>  | NH osteoblast          | 12 | 1.1×10 <sup>-3</sup>  | CD34+ (PB)                    | 3 | 0.054   |
| Hippocampus m.    | 7  | 1.0×10 <sup>-3</sup>  | Adipose                | 12 | 1.1×10 <sup>-3</sup>  | Inferior t. lobe              | 4 | 0.059   |
| Inferior t. lobe  | 7  | 1.1×10 <sup>-3</sup>  | Kidney                 | 10 | 3.9×10 <sup>-3</sup>  | Mid-frontal lobe              | 4 | 0.060   |
| Adipose           | 6  | 4.2×10 <sup>-3</sup>  | K562                   | 8  | 7.8×10 <sup>-3</sup>  | CD8+ (mem)                    | 3 | 0.065   |
| Angular gyrus     | 6  | 5.9×10 <sup>-3</sup>  | Chondrogenic d.        | 9  | 0.021                 | CD8+ (naïve)                  | 2 | 0.134   |
| Anterior caudate  | 6  | 8.3×10 <sup>-3</sup>  | Cingulate gyrus        | 9  | 0.037                 | Substantia nigra              | 3 | 0.143   |
| Substantia nigra  | 5  | 0.016                 | Hippocampus m.         | 9  | 0.038                 | NH osteoblast                 | 3 | 0.160   |
| HSMM              | 5  | 0.018                 | Angular gyrus          | 9  | 0.041                 | Adipose                       | 3 | 0.162   |
| Cingulate gyrus   | 5  | 0.024                 | Inferior t. lobe       | 9  | 0.042                 | Hippocampus m.                | 3 | 0.181   |
| HepG2             | 4  | 0.024                 | Mid-frontal lobe       | 9  | 0.044                 | Angular gyrus                 | 3 | 0.187   |
| Kidney            | 4  | 0.047                 | Substantia nigra       | 8  | 0.051                 | K562                          | 2 | 0.237   |
| NH osteoblast     | 4  | 0.073                 | Anterior caudate       | 9  | 0.060                 | Chondrogenic d.               | 2 | 0.387   |
| Pancreatic islets | 4  | 0.075                 | Pancreatic islets      | 8  | 0.069                 | Cingulate gyrus               | 2 | 0.439   |
| K562              | 3  | 0.089                 | HSMM                   | 7  | 0.128                 | Anterior caudate              | 2 | 0.487   |
| Chondrogenic d.   | 3  | 0.1194                | CD34+ (PB)             | 5  | 0.132                 | HepG2                         | 1 | 0.632   |

**Supplementary Table 10: Clusters inferred from LINCS co-expression.** <sup>1</sup>Annotated in 'IL-17 signaling pathway' (KEGG), 'TNF signaling pathway' (KEGG) or 'TNF-alpha effects on cytokine activity, cell motility, and apoptosis' (BioPlanet). <sup>2</sup>Annotated in 'JAK-STAT signaling' (KEGG), 'JAK-STAT signaling pathway' (BioPlanet) or 'IL-6/JAK/STAT3 Signaling' (MSigDB).

| Chr | rsID        | Position (hg19) | Genes                           | Cluster | IL17/<br>TNFa <sup>1</sup> | JAK/<br>STAT <sup>2</sup> |
|-----|-------------|-----------------|---------------------------------|---------|----------------------------|---------------------------|
| 1   | rs6672420   | 25291010        | <i>RUNX3</i>                    | 1       |                            |                           |
| 2   | rs1177202   | 61074576        | <i>REL, PUS10</i>               | 1       |                            |                           |
| 5   | rs3843503   | 131466629       | <i>CSF2, P4HA2</i>              | 1       | X                          | X                         |
| 5   | rs2546890   | 158759900       | <i>IL12B</i>                    | 2       | X                          | X                         |
| 6   | rs2247179   | 31266952        | <i>HLA-B/C, TNF, HLA-DRB1/5</i> | 1       | X                          | X                         |
| 6   | rs9321623   | 137958265       | <i>TNFAIP3</i>                  | 1       | X                          |                           |
| 6   | rs2451279   | 159515077       | <i>TAGAP</i>                    | N/A     |                            |                           |
| 7   | rs17259252  | 37382520        | <i>ELMO1</i>                    | 3       |                            |                           |
| 7   | rs10243355  | 150356318       | <i>GIMAP2/6</i>                 | 1       |                            |                           |
| 10  | rs2256774   | 6097165         | <i>IL2RA</i>                    | 2       | X                          | X                         |
| 10  | rs2459446   | 75601596        | <i>CAMK2G</i>                   | 3       |                            |                           |
| 10  | rs1108618   | 81043743        | <i>ZMIZ1</i>                    | 1       |                            |                           |
| 11  | rs4647737   | 47253244        | <i>MYBPC3, AGBL2</i>            | 2       |                            |                           |
| 11  | rs479777    | 64107477        | <i>PRDX5, RPS6KA4</i>           | 2       | X                          |                           |
| 11  | rs4262739   | 128421175       | <i>ETS1</i>                     | 1       | X                          |                           |
| 12  | rs4149576   | 6449115         | <i>CD27, LTBR, TNFRSF1A</i>     | 3       | X                          | X                         |
| 13  | rs9591325   | 50811220        | <i>DLEU1</i>                    | 3       |                            |                           |
| 16  | rs413024    | 11354091        | <i>PRM1/2, SOCS1, TNP2</i>      | 2       |                            | X                         |
| 17  | rs35840966  | 40521204        | <i>STAT3, STAT5A/B</i>          | 3       |                            | X                         |
| 19  | rs34536443  | 10463118        | <i>TYK2, CDC37, PDE4A</i>       | 2       |                            | X                         |
| 19  | rs142213240 | 10972474        | <i>ILF3, CARM1, SLC44A2</i>     | 2       |                            |                           |
| 19  | rs56234966  | 49922071        | <i>DKKL1, SLC6A16</i>           | 2       |                            |                           |
| 22  | rs4821560   | 37311806        | <i>CSF2RB, NCF4</i>             | 1       | X                          | X                         |
